# Sexually distinct song cultures in a songbird metapopulation

Wesley H. Webb<sup>1\*</sup>, Michelle M. Roper<sup>1</sup>, Matthew D. Pawley<sup>1</sup>, Yukio Fukuzawa<sup>1</sup>, Aaron M.  
Harmer<sup>1</sup>, Dianne H. Brunton<sup>1</sup>

<sup>1</sup>School of Natural and Computational Sciences, Massey University, Auckland, New  
Zealand

\*Corresponding author. Email [wesleythewebb@gmail.com](mailto:wesleythewebb@gmail.com)

Keywords: Female song, dialects, cultural evolution, birdsong, avian, bioacoustics

# Abstract

Songbirds learn their songs culturally, through imitating tutors. The vocal culture of a songbird population changes as new song units (syllables) are introduced through immigration, copying errors, and innovation, while other syllables fall out of use. This leads to a diversification of the syllable pool across the species, much like the diversification and spatial patterns of human language. Vocal cultures have been well studied in male songbirds but have been largely overlooked in females. In particular, few studies compare spatial variation of male and female song cultures. Here we undertake one of the first comparisons of male and female song culture in birds, analysing song data from a metapopulation of New Zealand bellbirds *Anthornis melanura*, spanning an archipelago of six islands. Having classified 20,700 syllables, we compare population syllable repertoire sizes and overlap between sites and sexes. We show that males and females—both with complex songs—have distinct song cultures, sharing only 6–26% of syllable types within each site. Furthermore, male and female syllable types can be statistically discriminated based on acoustic properties. Despite diverse syllable repertoires within sites, very few syllable types were shared between sites (both sexes had highly distinct site-specific dialects). For the few types shared between sites, sharing decreased with distance only for males. Overall, there was no significant difference between sexes in degree of site–site repertoire overlap. These results show different cultural processes at play for the two sexes. We discuss the implications for future research on female culture.

## Introduction

Culture is shared information or behaviour acquired through social learning from conspecifics (Dawkins, 1976), involving the transmission of *memes* (units of culture) by behavioural imitation. Vocal culture—the social learning of acoustic memes—has so far been observed in songbirds (oscines; Passeri), some suboscines (*Procnias* spp., Cotingidae), parrots, hummingbirds, cetaceans, elephants, seals, bats, and humans (Paton et al., 1981; Baptista and Schuchmann, 1990; Janik and Slater, 1997; Poole et al., 2005; Sanvito et al., 2007; Catchpole and Slater, 2008; Kroodsma et al., 2013). In these taxa, the vocal repertoire of a population changes as new memes are introduced through immigration, copying errors, and innovation, while other memes fall out of use (Catchpole and Slater, 2008). This leads to a diversification of the meme pool across the species, much like the diversification of human language—resulting in dialects (Podos and Warren, 2007). Geographic dialects have been documented in most vocally learning taxa, but very extensively in songbirds (Jenkins, 1978; Whitehead and Rendell, 2014; Aplin, 2019).

Despite the high volume of studies on male song culture and dialects, virtually nothing is known about female song culture. This is partly due to a northern-hemisphere-biased view of sexual selection that emphasises male-male competition and female choice in driving elaborate traits in males (Darwin, 1871), but which does not provide a framework for understanding elaborate female traits (Riebel et al., 2019). Female song (and other elaborate female traits) have been overlooked as non-functional aberrations, resulting ‘accidentally’ from shared genetic architecture with males (Darwin, 1871; Lande, 1980; see Tobias et al., 2012 for review). This view has now been roundly discounted. Female song is present in 64% of surveyed songbird species (Webb et al., 2016), has been recovered as the ancestral state (Odom et al., 2014), can evolve independently of the male

song phenotype (Price, 2015) and has female-specific functions in territory and resource defence, mate attraction, mate defence, and pair bonding (see Austin et al. 2021 for review).

Overlooking female song culture has impeded development of a more general theory that accounts for both sexes. For instance, the possibility that females could have song cultures distinct from conspecific males, with different geographic patterns of song sharing, has hardly been investigated at a population level (Graham et al., 2017a).

Studies have reported a wide degree of sexual song dimorphism in songbirds, from identical repertoires for males and females at one extreme [e.g. forest weaver *Symplectes bicolor* (Wickler and Seibt, 1980), magpie lark *Grallina cyanoleuca* (Hall, 2000)], to completely non-overlapping repertoires at the other [e.g. many duetting wrens; (Brown and Lemon, 1979; Levin, 1996; Mann et al., 2009)]. However, studies comparing the sexes have mostly focused on within-pair repertoires in duetting species. To our knowledge, only four studies have compared spatial variation of male and female songs at a population level.

First, Mennill and Rogers (2006) examined the songs of duetting male and female eastern whipbird *Psophodes olivaceus* across their geographic range. While male whipbird song was highly consistent over space, female song showed pronounced variation, with multiple distinct song types. The authors suggest eastern whipbirds have undergone a decoupling of male and female song learning strategies in response to different sex-specific selection pressures.

Three later studies on rufous-and-white wrens (Graham et al., 2017a, 2018, 2021) showed that song cultures of males and females can be similar in complexity, and appear to evolve in similar directions via acoustic adaptation and cultural drift. However, males

and females differ in the relationship between dispersal distance and song-sharing with parents (Graham et al., 2017a), the speed of cultural change, and the relationship between immigration rate and cultural diversity (Graham et al., 2021).

We know of no other studies to examine spatial variation in song culture at a population level, comparing both sexes.

The New Zealand bellbird *Anthornis melanura*—hereafter ‘bellbird’—provides an ideal system for comparing male and female song cultures over space. The bellbird is a non-duetting endemic honeyeater (Family Meliphagidae) with complex, geographically diverse song in both sexes, and probable open-ended learning (Roper, 2018). Bellbird populations occur across a network of islands and peninsulas in the Hauraki Gulf, northeastern New Zealand. Population connectivity is substantial, and regulated by geographic isolation (Baillie, 2011; Baillie et al., 2014). Females disperse more frequently than males, resulting in higher female connectivity between sites (as typical for songbirds: Greenwood, 1980; Clarke et al., 1997; Paris et al., 2016).

In this paper, we seek to advance understanding of female birdsong culture by comparing the patterns of male and female meme sharing across a network of six island and peninsula populations (Figure 1). Our questions are:

(1) *Are there sexual differences in population syllable repertoire size?*

(2) *How much do male and female population repertoires overlap?*

(3) *What is the pattern of syllable type sharing between sites?*

If geographic proximity drives cultural connectivity between islands, we expect sites that are closer together will share more memes (i.e. an isolation-by-distance pattern in vocal

108 culture). We also expect higher female dispersal frequency will result in higher sharing of  
109 syllable types between sites than for males.

110

111

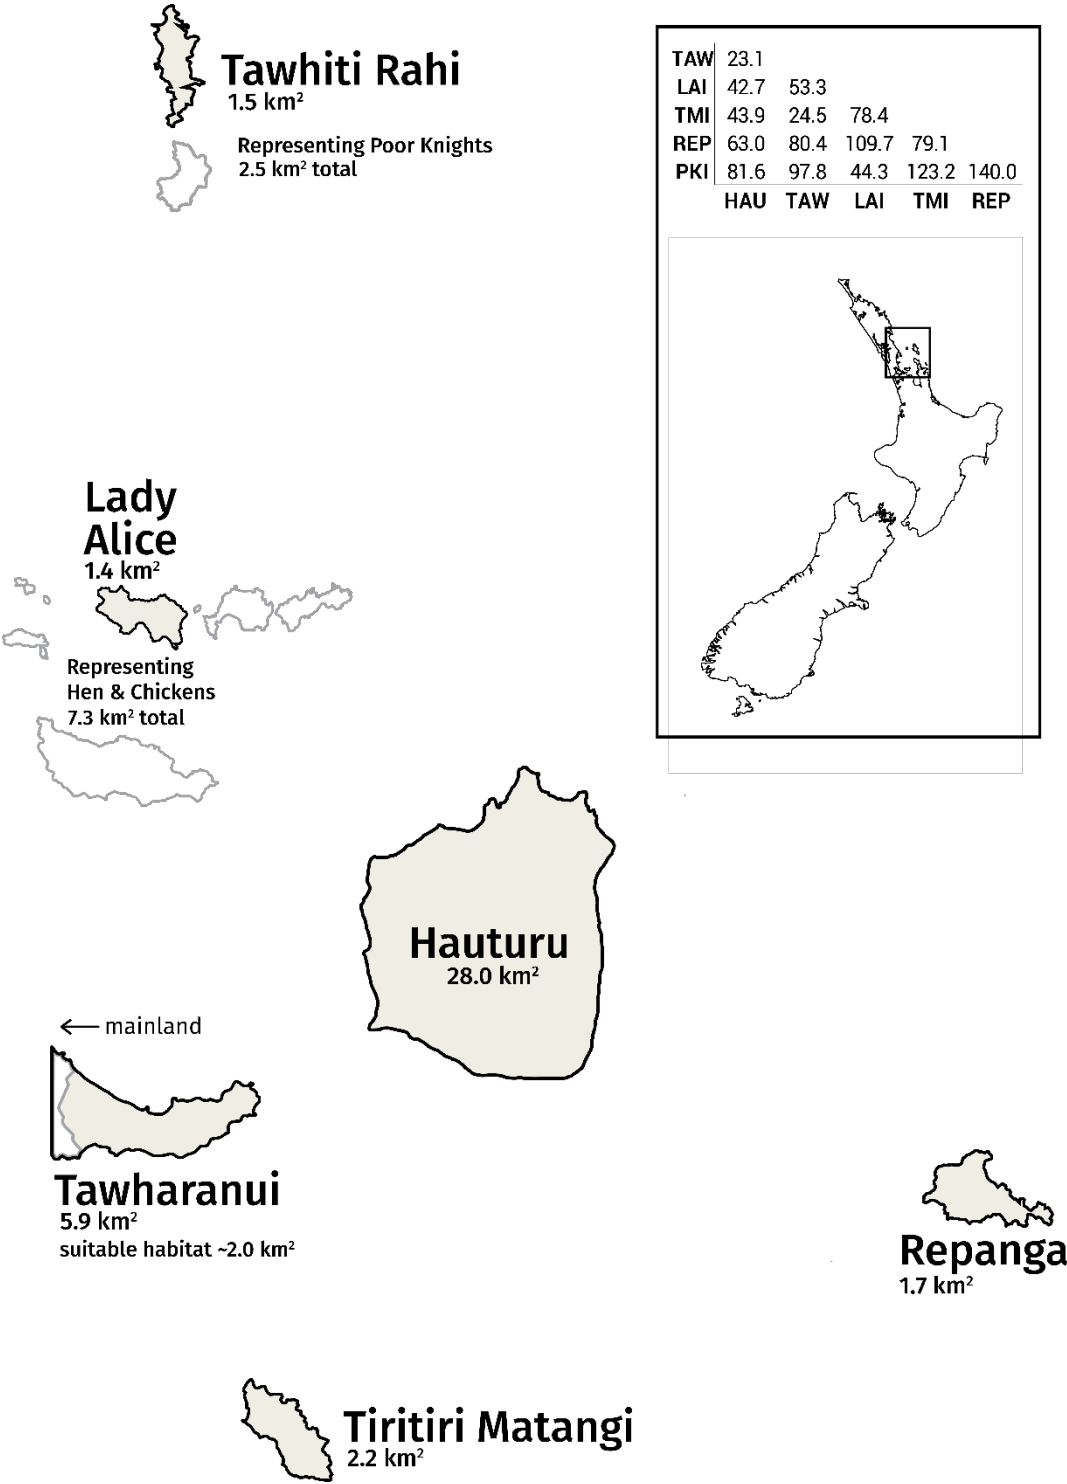

**Figure 1—Simplified map of the Hauraki Gulf archipelago, home to a metapopulation of bellbirds.**

Tawhiti Rahi represents the Poor Knights Islands group; likewise, Lady Alice Island represents the Hen and Chickens Islands group. The other islands of these wider groups are shown in white. The distance matrix between sites (measured in km) is provided (HAU, Hauturu; TAW, Tawharanui; LAI, Lady Alice; TMI, Tiritiri Matangi; REP, Repanga, PKI, Tawhiti Rahi). Distances not to scale on simplified map.

## Methods

### Creating the song database

#### Recording bellbird song

Recording trips were conducted to six island and mainland peninsula sites in the Hauraki Gulf 2013–2017 (Table 1), with iwi consent (Ngatiwai, Ngati Manuhiri) and permits from the New Zealand Department of Conservation (47948–FAU, 34833–FAU, 41756–FAU, 48000–FAU) and Massey University Animal Ethics Committee (permit number 15/21). The sites were chosen based on their large bellbird populations (good return for sampling effort) and their variety in connectivity. A team of 1–5 recordists per site collectively spent a total of over 1,000 recordist-hours actively tracking and recording wild bellbirds (per site: Tawhiti Rahi, 108; Lady Alice, 110; Hauturu, 140; Tawharanui, 132; Repanga, 260; Tiri, many hundreds of hours), with Marantz PMD661 portable solid-state recorders paired with handheld Sennheiser ME-66 shotgun microphones. Recordists coordinated movement to sample sites systematically and with maximal coverage, gathering 2,137 high-quality recorded songs (discrete vocalisation bouts) by adult individuals of known sex, during daylight hours. During recording, metadata including identity, age and sex of the focal bird was spoken into the microphone for later transcription.



**Table 1—Geographic and sampling information for the six study sites.**

Tawhiti Rahi represents the larger Poor Knights Islands group; likewise, Lady Alice Island represents the larger Hen & Chickens Islands group. Elevation data from [www.topomap.co.nz](http://www.topomap.co.nz). In the Sample size column, M=male and F=female.

| Sites                                                         | GPS Coordinates           | Area (km <sup>2</sup> )                             | Elevation                    | Recording dates and number of recordists                                       | Sample size                                |
|---------------------------------------------------------------|---------------------------|-----------------------------------------------------|------------------------------|--------------------------------------------------------------------------------|--------------------------------------------|
| Tawhiti Rahi<br>(representing Poor Knights Island group)      | 35°28'06"S<br>174°44'13"E | 1.5<br>(2.5 including neighbouring island, Aorangi) | 191 m<br>(216 m for Aorangi) | Single trip 23/02/2017–27/02/2017<br>3 recordists                              | Birds: 128 M, 48 F<br>Songs: 309 M, 61 F   |
| Lady Alice (represents larger Hen and Chickens Islands group) | 35°53'23"S<br>174°43'41"E | 1.4 (7.3 including entire Hen and Chickens group)   | 158 m<br>(417 m for Hen)     | Single trip 27/05/2015–30/05/2015<br>4 recordists                              | Birds: 149 M, 116 F<br>Songs: 181 M, 126 F |
| Hauturu                                                       | 36°11'57"S<br>175°04'53"E | 28.0                                                | 722 m                        | Single trip 05/04/2016–09/04/2016<br>4 recordists                              | Birds: 57 M, 63 F<br>Songs: 67 M, 98 F     |
| Tawharanui                                                    | 36°22'20"S<br>174°50'30"E | 5.9                                                 | 91 m                         | 20/04/2016, 18/08/2016,<br>01/09/2016–07/09/2016, 22/09/2016<br>1–3 recordists | Birds: 66 M, 26 F<br>Songs: 206 M, 37 F    |
| Repanga                                                       | 36°26'11"S<br>175°46'16"E | 2.0                                                 | 214 m                        | Single trip 03/11/2016 – 09/11/2016<br>5 recordists                            | Birds: 122 M, 141 F<br>Songs: 328 M, 196 F |
| Tiritiri Matangi                                              | 36°36'01"S<br>174°53'24"E | 2.2                                                 | 80 m                         | Frequent recordings in non-winter months 2013–2015<br>1–2 recordists           | Birds: 91 M, 58 F<br>Songs: 389 M, 138 F   |

## **Segmenting songs into syllables**

Songs were imported into a database and manually segmented into syllables in *Koe* bioacoustics software (Fukuzawa et al., 2020) by visually inspecting the spectrogram and setting syllable start/end points. Bellbirds mostly sing in discrete units that are easy to demarcate as syllables based on a gap either side. Occasionally there are fast-paced bursts where it is not clear where one unit ends and another begins; in these cases sounds were grouped together as a syllable if they were separated by less than 15 ms of silence. This value was chosen through trial and error for the best consistency of syllable groupings.

## **Classifying syllables**

To prepare for classification, the 20,700 segmented syllables were ranked by acoustic similarity in *Koe*. Similarity was calculated by extracting all available acoustic features for each unit and applying the UPGMA method (Sokal, 1958); see <https://github.com/fzyukio/koe/wiki> for details of extracted features and similarity index calculation.

WHW then compared syllables visually and aurally to classify them into types based on just-noticeable differences in pitch, timbre, and duration of the playback and visual appearance of the spectrogram. Manual perception-based classification is considered excellent for acoustic classification (Sayigh et al., 2007; Duda et al., 2012) and allowed finer scale than automated classification methods, such as multi-dimensional scaling (MDS) or principal component analysis (PCA). The high acuity of bird hearing relative to humans (Dooling, 2004) justifies a fine-scale classification approach. We validated our classification by having 74 inexperienced judges independently label a subset of syllables. Average match with our own labels was 89.6% (median 95.6%); see Fukuzawa et al. (2020) and Article S1A for more details.

## **Sex differences in population-level repertoires**

### **Male and female syllable diversity**

The raw number of syllable types recorded at each site are not directly comparable, due to the inevitable confounding of different sampling effort. To account for this, we used the statistical software *EstimateS* (Colwell, 2013) to produce syllable type accumulation curves and extrapolate the true number of syllable types at each site (Article S1B).

### **Repertoire overlap of male and female population sectors**

For each site we calculated the percentage overlap between male and female population repertoires, using the Jaccard similarity index (Hamers et al., 1989): the number of shared types divided by the total number of types.

Next, the acoustic feature measurements of all syllables (previously extracted to aid classification in *Koe*) were normalised by mean-centering and dividing by standard deviation. To test whether male-only, female-only, and shared syllable types form three distinguishable clusters in acoustic space, we classified syllables using a linear discriminant analysis (LDA) on the data, with leave-one-out cross-validation. If male-only, female-only, and shared syllables are randomly interspersed in acoustic space, then the LDA classification results will be similar to random assignment of groups. If the three groups occupy more distinct ranges, then the LDA classification will perform much better than random assignment.

### **The pattern of syllable type sharing between sites**

We calculated repertoire overlaps between sites, for all pairwise combinations of site lists—comparing males against males, females against females. For each sex we tested for an isolation-by-distance pattern in repertoire overlaps between sites, in two ways.

First, we conducted a Hauturu-centric analysis. The large size and geographic centrality of the Hauturu population make it likely to be a substantial source of dispersing bellbirds to other sites in the Hauraki Gulf archipelago. We calculated Spearman rank correlation between *population repertoire overlap with Hauturu* against *geographic distance from Hauturu*.

Next, to test for an overall isolation-by-distance pattern, we calculated Spearman rank correlation between *percentage of site–site repertoire overlap* against *site–site geographic distance* for all pairwise combinations of sites in the archipelago. In this case, to account for non-independence of points (being pairwise combinations), we used the RELATE routine in *PRIMER* (version 7, Clarke and Gorley, 2015) with 9999 permutations.

To test whether males or females share more syllables between sites overall, we used a two-tailed Sign Test (Dixon and Mood, 1946), with null hypothesis: the degree of site–site sharing is equal between sexes (Article S1C).

## Results

### Sex differences in population repertoires

#### Male and female syllable diversity

Across the metapopulation we recorded a total of 702 syllable types: 337 male-only, 203 female-only, and 162 shared. See Data S1 and Table S1 for a complete catalogue.

For each site and sex, the syllable type accumulation curve levelled off nearly or completely by 500 songs (i.e. approximating the true number of syllable types present), allowing meaningful comparison of syllable diversity (Figure S1).

There was no evidence of a difference in repertoire size for males versus females within sites; 95% confidence intervals overlap for males and females in all cases (Table 2). There was high variability between sites for both sexes, with male point estimates ranging from 80 (Repanga) to 186 (Hauturu) and females from 81 (Repanga) to 186 (Hauturu).

### Repertoire overlap of male and female population sectors

Male and female population sectors had largely separate repertoires, ranging from 6% total units shared at Tawhiti Rahi to 26% shared at Hauturu (Figure 2, Table S2). In other words, 74–94% of syllable types at each site were sung by one sex only.

**Table 2—Extrapolated estimates of male and female syllable diversity within sites.**

Estimated number of syllable types at 500 songs, for male and female population sectors at each site. Ninety-five-percent confidence intervals are in brackets. Calculated with the statistical software *Estimate S* (Colwell, 2013).

| Site                  | Male                                        | Female                                    |
|-----------------------|---------------------------------------------|-------------------------------------------|
| Tawhiti Rahi          | <b>135</b> (121–149)<br><i>n</i> =306 songs | <b>119</b> (68–169)<br><i>n</i> =58 songs |
| Lady Alice            | <b>143</b> (118–169)<br><i>n</i> =181       | <b>128</b> (93–163)<br><i>n</i> =125      |
| Hauturu               | <b>186</b> (139–234)<br><i>n</i> =67        | <b>186</b> (151–220)<br><i>n</i> =98      |
| Tawharanui            | <b>116</b> (103–129)<br><i>n</i> =204       | <b>89</b> (48–130)<br><i>n</i> =37        |
| Repanga               | <b>80</b> (72–89)<br><i>n</i> =328          | <b>81</b> (65–97)<br><i>n</i> =196        |
| Tiri 2013, 2014, 2015 | <b>165</b> (152–178)<br><i>n</i> =389       | <b>145</b> (115–175)<br><i>n</i> =138     |

## Syllable types

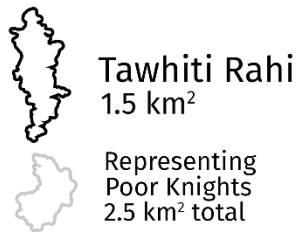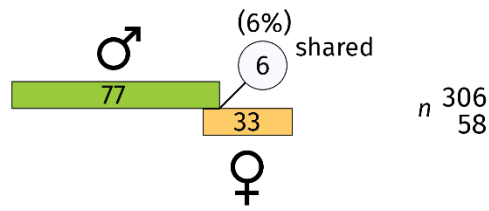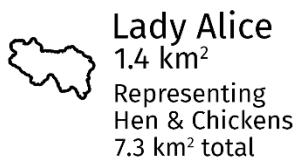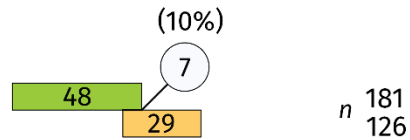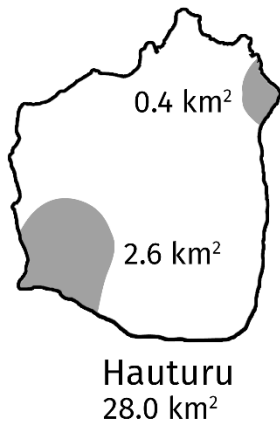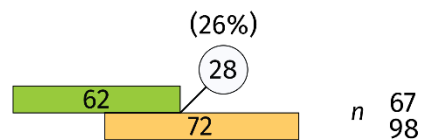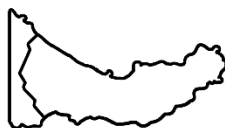

**Tawharanui**  
5.9 km<sup>2</sup>  
Suitable habitat ~2.0 km<sup>2</sup>

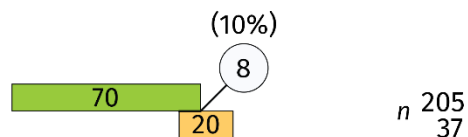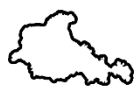

**Repanga**  
2.0 km<sup>2</sup>

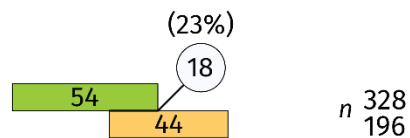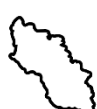

**Tiri 2013,  
2014, 2015**  
2.2 km<sup>2</sup>

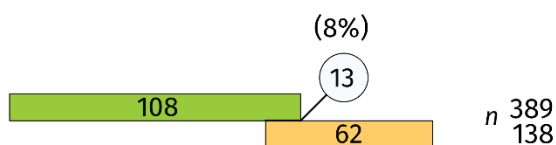

## Figure 2—Overlap of male and female population syllable repertoires.

Each diagram indicates the recorded number of male (green bar) and female (orange bar) syllable types, and the number of types common to both sexes (circle). The percentage overlap is given above the circle, calculated as the Jaccard similarity index: number shared divided by total number of types. For robustness, repertoires exclude types with fewer than three occurrences within that site-and-sex group. Bar length is proportional to the number of syllable types, and overlap length is proportional to the number of shared syllable types. Sample sizes (number of songs) for the male and female bars are given to the right of the bars. Note that repertoire sizes are recorded values, not extrapolated, and therefore are not directly comparable due to differing sample sizes. However, relative overlap percentage is more robust to differing sample sizes and thus meaningful to compare.

In the Linear Discriminant Analysis (LDA) ordination, male-only and female-only syllables form two clear, partially-overlapping clusters, with shared syllables in between, when data from all sites are pooled. For individual sites the configuration of the three clusters varies but shows a tendency for female-only syllables to occur at lower LD1 values, male-only to occur at higher LD1 values, with shared syllables in between.

Success of the LDA leave-one-out classifier had an overall *lift* of 1.78; that is, the LDA assigned labels (male-only, female-only and shared) to syllables overall 1.78 times better than random allocation of labels. Lift was 1.51 for male-only syllables, 3.99 for female-only syllables, and 2.15 for shared syllables. P values for all lift tests were <0.001; i.e. in all cases none of the 4999 null distributions had a lift as large as the observed lift. Therefore, male-only, female-only and shared types can be separated on the basis of acoustic features.



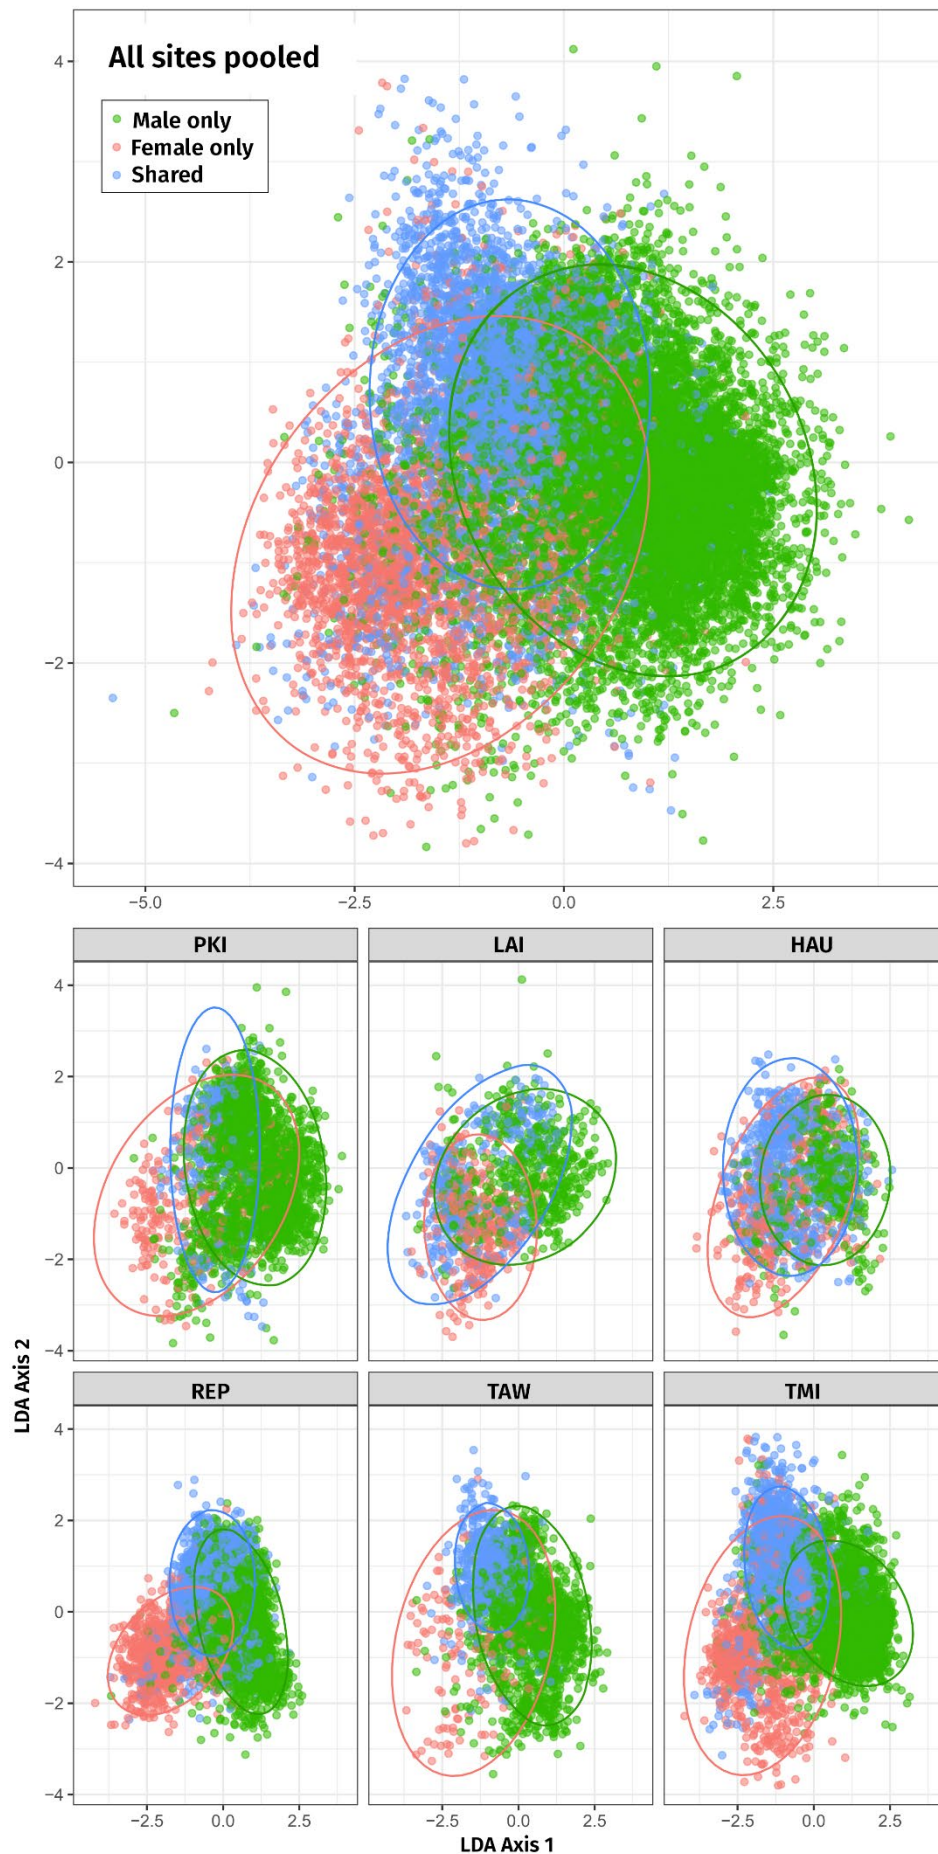



**Figure 3—Two-dimensional linear discriminant analysis (LDA) of male-only, female-only, and shared syllables for all sites combined (top) and each site separately (bottom).**

Ellipses represent the regions covering 95% of the data (according to the fitted normal). Each site is plotted using the same axes to be comparable. Site abbreviations are as follows: PKI, Tawhiti Rahi, representing Poor Knights Islands; LAI, Lady Alice Island, representing Hen & Chickens; HAU, Hauturu; REP, Repanga; TAW, Tawharanui; TMI, Tiri (2013, 2014, 2015).

**The pattern of meme sharing between sites**

**Site–site repertoire overlap**

Matrices of site–site repertoire overlap are presented in Figure 4. The degree of site-site repertoire overlap between male populations was low, ranging 3–18% (median=6%); for females: 1–12% (median=5%). Remarkably, for both sexes, the syllable types shared between sites were almost exclusively pure-tone whistle syllables or simple stutter-like syllables. The one exception was Hauturu–Tawharanui, which additionally shared some more complex types following the recent Hauturu→Tawharanui founder event (Brunton et al., 2008). See Data S2.

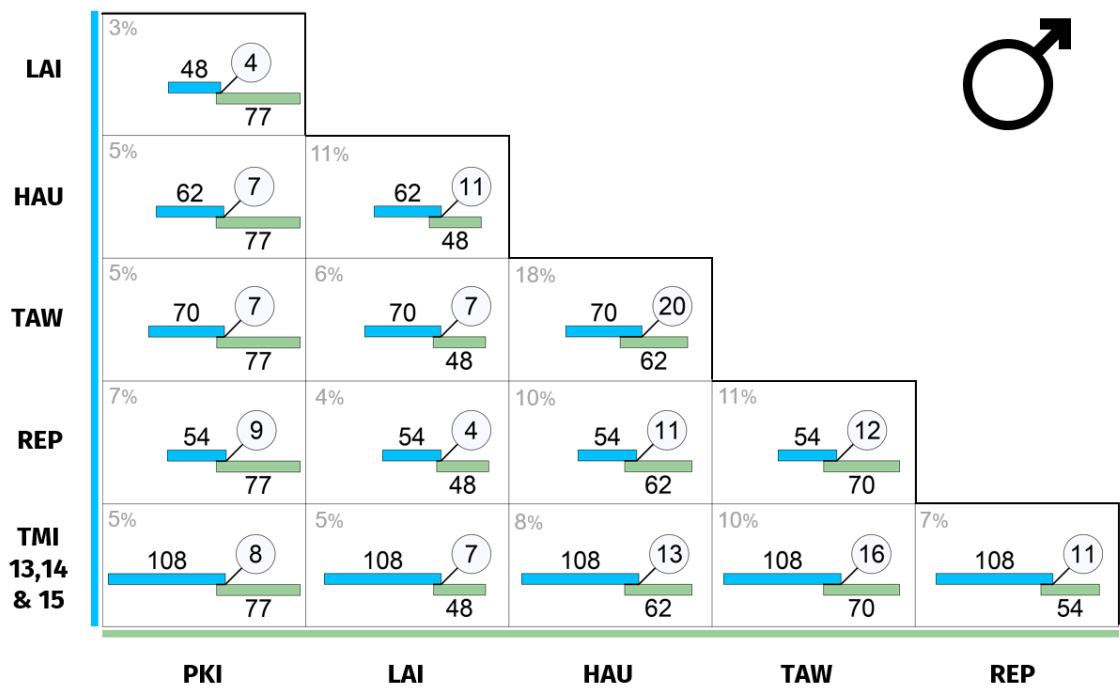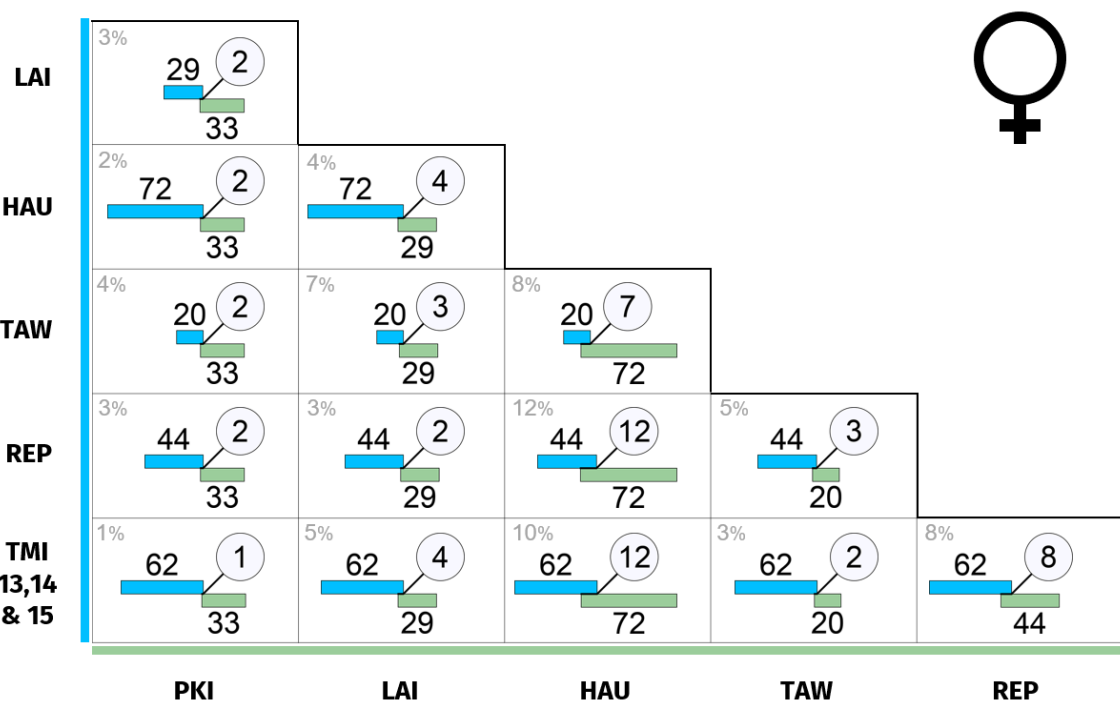

**Figure 4—(Top) Male population repertoire overlap between sites. (Bottom) Female population repertoire overlap between sites.**

Each cell indicates the recorded number of syllable types for the two sites (blue and green bars), and the number of types common to both (circle). The percentage overlap is given at the top left of each cell and is calculated as Jaccard similarity index:  $\text{Number of types shared} / (\text{number of types at Site A} + \text{number of types at Site B} - \text{number of types shared})$ . For robustness, repertoires exclude types with fewer than three occurrences within that site and sex. Bar length is proportional to the number of syllable types, and overlap length is proportional to the shared number of syllable types. Site abbreviations are as follows: PKI, Tawhiti Rahi (representing Poor Knights Islands); LAI, Lady Alice Island (representing Hen and Chickens); HAU, Hauturu; TAW, Tawharanui; REP, Repanga; TMI, Tiri.

## Repertoire overlap versus distance

Repertoire overlap with Hauturu versus geographic distance from Hauturu is shown in Figure 5A. There was a negative correlation between sharing and distance for males ( $r_s = -0.90$ ,  $df=3$ ,  $0.03 < p < 0.05$ ) but no relationship for females ( $r_s = -0.10$ ,  $df=3$ ,  $p > 0.10$ ). Contrary to predictions, sites at increasing distances from Hauturu did not share a progressively diminishing subset of syllable types with Hauturu, but different (apparently unrelated) subsets; this was true for both males and females (Data S2).

When considering sharing between *all* pairwise combinations of sites in the archipelago (Figure 5B), we did not find evidence of an isolation-by-distance pattern, for males ( $\rho = -0.525$ ,  $p = 0.064$ ) and females ( $\rho = -0.525$ ,  $p = 0.076$ ).

The recent founder event, where bellbirds from Hauturu colonised Tawharanui (Brunton et al., 2008) could possibly inflate the degree of sharing between the two sites, compared to other sites where both populations are long-established. Therefore we tested robustness of the correlations to removal of the Hauturu–Tawharanui datapoint, but found little change in the slope or strength of the correlations.

There was no evidence of an overall difference between males and females in the degree of site-site repertoire overlap; out of 15 site-site comparisons, males shared a higher percentage of syllables than females in 9 cases, lower in 4 cases, and equal in two cases (Sign Test  $p = 0.17$ ).

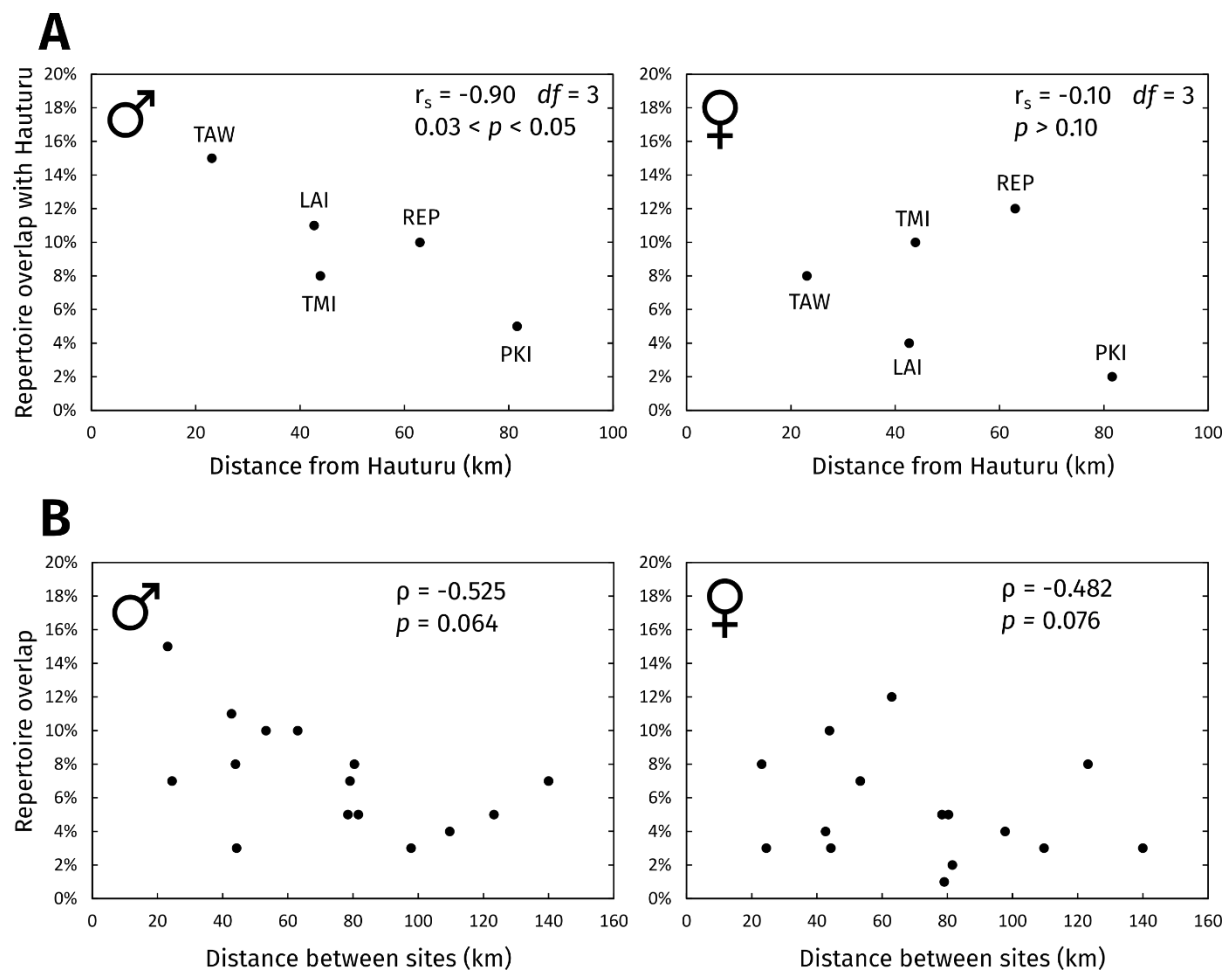

**Figure 5—Repertoire overlap versus distance between sites.**

**(A)** Repertoire overlap with Hauturu versus distance from Hauturu. Overlaps were calculated on repertoire lists of types with 3+ occurrences within each site-and-sex group. Site abbreviations: TAW, Tawharanui; LAI, Lady Alice Island (representing Hen and Chickens); TMI, Tiri (2013, 2014, 2015); REP, Repanga; PKI, Tawhiti Rahi (representing Poor Knights Islands). **(B)** Site-site repertoire overlap versus site-site geographic distance, for all pairs of sites. Spearman rank correlations were calculated using the RELATE routine in *PRIMER* (version 7) with 9999 permutations, accounting for the non-independence of points.

## Discussion

This is one of the first comparisons of male and female song cultures over space (Mennill and Rogers, 2006; Graham et al., 2018a, 2018b, 2021). We found that male and female bellbirds have comparable repertoire sizes (at a population level; Table 2), and sexually distinct vocal cultures, sharing only a small percentage of syllable types between sexes (6–26% within each site; Figure 2). Whether a type is male-specific, female-specific, or shared between sexes can be predicted based on its acoustic properties (Figure 3). Furthermore, song cultures of both sexes differ dramatically between sites—demonstrating male and female song dialects (Figure 4, Data S1). Despite a large and varied repertoire *within* sites, generally the only types shared *between* sites were flat-contour, pure-tone whistle syllables (Article S1A) or simple stutter-like syllables. Between-site sharing of these syllable types decreased with distance for males but not females. These contrasting patterns of sharing across the archipelago may result from sex differences in dispersal, meme mutation rates and song-learning modes.

Comparisons of male and female repertoire sizes typically focus on individual-level repertoires. Such studies have found smaller female repertoires in some cases (e.g. rufous-and-white wrens *Thryophilus rufalbus*, Mennill and Vehrencamp, 2005; banded wrens *Thryophilus pleurostictus*, Hall et al., 2015), equal-sized repertoires in other cases (e.g. bay wren *Thryothorus nigricapillus*, Levin, 1996), and at least one case of larger female repertoire size (stripe-headed sparrow *Peucaea r. ruficauda*, Illes, 2014). The drivers of individual repertoire size are thought to differ between sexes, with males under selection from male–male competition and female choice (Catchpole, 1987; Hill et al., 2018), and females primarily from female–female competition for non-sexual breeding resources (Tobias et al., 2012). In the present study, similar male and female repertoire

sizes could be explained by bellbird social ecology. Bellbirds are socially monogamous (Roper, 2018), and both sexes are highly social and aggressive in singing interactions. It is plausible, therefore, that similar intensity of competition and social interaction drive the evolution of similar syllable diversity in the two sexes. However, our analysis is on population-level repertoires, which are a product of both individual repertoire sizes and variation between individuals. For example, equal male and female population repertoire sizes could also result if male individual repertoires are larger and more consistent between individuals (cultural conformity; Aplin et al., 2015), and females smaller and more variable (cultural non-conformity; Riebel et al., 2015). Additional focused recording of banded individuals is required to quantify these two sources of diversity.

It is interesting that population repertoire sizes varied greatly between sites. Adaptation to differing acoustic environments (Potvin and Clegg, 2015; Graham et al., 2017b) seems an unlikely explanation, as all sites were coastal, with similar vegetation structure (though soundscape was not measured). Another potential explanation is that genetic diversity has driven population repertoire size. However, sites with low genetic diversity (Baillie, 2011) did not have correspondingly low syllable diversity, suggesting song culture is not tightly constrained by genetic diversity in bellbirds (see also Graham et al., 2018). We suspect that between-site differences in repertoire size are more likely driven by competition level. For example, sites with higher population density may have elevated competition for food, or sites with high population connectivity may experience increased competitive encounters with migrants—selecting for bigger individual repertoires.

The discovery of sexually distinct, yet partly overlapping syllable repertoires raises questions about transmission and function. Logically, all sex-specific syllables types must be learnt male-to-male or female-to-female (as in rufous-and-white wrens, for example;

Mennill and Vehrencamp, 2005). But what of types common to both sexes? These must reflect inter-sexual learning in some form, whether accidental or intentional (Evans and Kleindorfer, 2016). Once learnt inter-sexually, these memes could be transmitted intra-sexually and become an established part of the repertoire for that sex. Roper et al. (2018) found that juvenile male and female bellbird song is spectrally similar, then diverges prior to crystallisation. Perhaps both sexes of bellbird are physiologically capable of overlapping in acoustic space, but other factors (e.g. learning strategies, sexual/social selection) prevent it in the wild. This appears true in slate-coloured boubous *Laniarius funebris*; male and female boubous share no syllable types in the wild, but birds hand-raised under experimental conditions develop syllables of both sexes (Wickler and Seibt, 1988). Wild birds may choose to express sex-specific memes to help avoid being mistaken for the other sex, which risks attracting same-sex rivals or repelling potential mates (Logue et al., 2007). However, the benefit of *shared* syllables is unclear. Might sex-specific syllables function in intra-sexual communication, and shared syllables in inter-sexual communication? Sophisticated field experiments with banded individuals are needed to resolve meme functions and transmission modes in bellbirds.

We found that male-specific and female-specific syllables do occupy two largely distinct regions of acoustic space, with shared syllables occupying a cluster between in a 'sex-neutral' range (Figure 3). In the ordination, the consistent separation of male-specific and female-specific memes could be due to universal morphological constraints of body size and syrinx structure, as males are 20% larger than females (Heather and Robertson, 2000) and have different syrinx morphologies (Roper, 2018). At the same time, the spread and shape of the clusters vary widely between sites, which may reflect site-specific cultures.



The pattern of meme sharing between sites defied our expectations. Repertoire similarity was not strongly related to geographic proximity between islands; only males showed some evidence of isolation with distance from Hauturu (Figure 5). However, for both sexes the percentage of syllable types shared between sites was small, and almost totally limited to pure-tone whistle syllables and simple stutter-like syllables (except for Hauturu–Tawharanui, which shared more types, likely due to the recent founder event described in Brunton et al., 2008). The observed pattern suggests that immigrants abandon most source memes after arrival, retaining only simple pure-tone and stutter-like types. Perhaps all but these simple types incur high aggression at new sites (‘colony password’ hypothesis; Feekes, 1977) and so are dropped in favour of the local dialect.

The large size and geographic centrality of the Hauturu population make it a likely source of dispersing bellbirds to other sites in the archipelago. Thus, one might expect the islands around Hauturu to form a chain of ‘stepping stones’ for bellbird dispersal, leading to progressively more dissimilar repertoires away from the central source population. There are many examples of such chains (Irwin et al., 2005; Parker et al., 2012; Lachlan et al., 2013). In contrast, we found that for both male and female bellbirds, sites at increasing distances from Hauturu did not share a progressively diminishing subset of syllable types with Hauturu, but different (apparently unrelated) subsets (Data S2). Therefore, our results suggest direct dispersal to each site from Hauturu, rather than serial dispersal along the island chain.

We predicted that female-biased dispersal in bellbirds should result in higher female meme flow and thus higher inter-site sharing for females than for males. Instead, we found no evidence for a sexual difference in amount of sharing between sites. That females do not show higher inter-site sharing suggests that other processes—such as a higher

turnover rate or weaker retention of source memes— counteract the greater connectivity of female memes between sites.

Large-scale studies of song culture in the wild are challenging. In contrast to a laboratory situation, it is difficult to amass data, the identity of individuals is not known, and there is little control over the social context of singing—which limits assessment of individual-level mechanisms. However, our population-level analyses reveal distinct and complex female culture with different spatial patterns to male culture. This underlines the inadequacy of the male-centric research paradigm and calls for comparisons of male and female repertoires in many more species (Riebel et al., 2019). Sophisticated field experiments are now needed to resolve the mechanisms of dispersal, selection and learning modes that give rise to the pattern we have uncovered.

## **Author contributions**

Dianne Brunton and Wesley Webb conceived of the study. Wesley Webb, Michelle Roper, Dianne Brunton, and Aaron Harmer conducted the fieldwork with help from volunteers. Wesley Webb, Yukio Fukuzawa, and Michelle Roper created the song database. Wesley Webb, Yukio Fukuzawa and Matthew Pawley analysed the data, with guidance from Dianne Brunton and Aaron Harmer. Wesley Webb wrote the paper with guidance from the other authors.

## Data availability

The interactive *Koe* database can be accessed online at [koe.io.ac.nz](http://koe.io.ac.nz) with username *korimako* and password Bellbird\_Culture. See Data S3 for a table of all acoustic units and annotations, and Data S4 for a table of all songs and their metadata. Measurements of all syllables can be accessed at [10.5281/zenodo.5072580](https://zenodo.org/record/5072580).

## Acknowledgements

We thank Ngati Wai and Ngati Manuhiri iwi for their support, and Barbara Evans, Jessica Patino-Perez, and Mehrnaz Tavasoli for their help with recording song. The research was funded by a Marsden Fund grant (13-MAU-004) from the Royal Society of New Zealand Te Apārangi. The manuscript was improved by feedback from Rebecca Webb.

## References

- Aplin, L. M. (2019). Culture and cultural evolution in birds: a review of the evidence. *Anim. Behav.* 147, 179–187. doi:10.1016/j.anbehav.2018.05.001.
- Aplin, L. M., Farine, D. R., Morand-Ferron, J., Cockburn, A., Thornton, A., and Sheldon, B. C. (2015). Experimentally induced innovations lead to persistent culture via conformity in wild birds. *Nature* 518, 538–541. doi:10.1038/nature13998.
- Austin, V. I., Dalziel, A. H., Langmore, N. E., and Welbergen, J. A. Avian vocalisations: the female perspective. *Biol. Rev.* n/a. doi:<https://doi.org/10.1111/brv.12713>.
- Baillie, S. M. (2011). Population genetics, biogeography and ecological interactions of the New Zealand bellbird (*Anthornis melanura*) and their avian malaria parasites: a thesis presented in partial fulfilment of the requirements for the degree of Doctor of Philosophy (Ph. D.) in Zoology at Massey University, Albany, New Zealand. Available at: <http://muir.massey.ac.nz/handle/10179/2863> [Accessed July 18, 2014].
- Baillie, S. M., Ritchie, P. A., and Brunton, D. H. (2014). Population genetic connectivity of an endemic New Zealand passerine after large-scale local extirpations: a model of re-colonization potential. *Ibis* 156, 826–839. doi:10.1111/ibi.12182.

- 458 Baptista, L. F., and Schuchmann, K.-L. (1990). Song learning in the Anna hummingbird  
459 (*Calypte anna*). *Ethology* 84, 15–26.
- 460 Brown, R. N., and Lemon, R. E. (1979). Structure and evolution of song form in the wrens  
461 *Thryothorus sinaloa* and *T. felix*. *Behav. Ecol. Sociobiol.* 5, 111–131.  
462 doi:10.1007/BF00293301.
- 463 Brunton, D. H., Evans, B. A., and Ji, W. (2008). Assessing natural dispersal of New Zealand  
464 bellbirds using song type and song playbacks. *N. Z. J. Ecol.* 32, 147–154.
- 465 Catchpole, C. K. (1987). Bird song, sexual selection and female choice. *Trends Ecol. Evol.*  
466 2, 94–97. doi:10.1016/0169-5347(87)90165-0.
- 467 Catchpole, C. K., and Slater, P. J. B. (2008). *Bird song: Biological themes and variations*.  
468 2nd ed. New York, NY, US: Cambridge University Press  
469 doi:10.1017/CBO9780511754791.
- 470 Clarke, A. L., Saether, B.-E., and Røskft, E. (1997). Sex biases in avian dispersal: a  
471 reappraisal. *Oikos*, 429–438. doi:10.2307/3546885.
- 472 Clarke, K. R., and Gorley, R. N. (2015). *PRIMER v7: User Manual/Tutorial*. PRIMER-  
473 EPlymouth.
- 474 Colwell, R. (2013). EstimateS: *Statistical estimation of species richness and shared species*  
475 *from samples*. Available at: <http://purl.oclc.org/estimates>.
- 476 Darwin, C. (1871). *The descent of man and selection in relation to sex*. London: John  
477 Murray.
- 478 Dawkins, R. (1976). *The selfish gene*. Oxford University Press.
- 479 Dixon, W. J., and Mood, A. M. (1946). The Statistical Sign Test. *J. Am. Stat. Assoc.* 41, 557–  
480 566. doi:10.1080/01621459.1946.10501898.
- 481 Dooling, R. (2004). “Audition: can birds hear everything they sing?,” in *Nature’s Music*  
482 (Elsevier), 206–225. doi:10.1016/B978-012473070-0/50010-4.
- 483 Duda, R. O., Hart, P. E., and Stork, D. G. (2012). *Pattern classification*. John Wiley & Sons.
- 484 Evans, C., and Kleindorfer, S. (2016). Superb fairy-wren (*Malurus cyaneus*) sons and  
485 daughters acquire song elements of mothers and social fathers. *Front. Ecol. Evol.*  
486 4, 9.
- 487 Feekes, F. (1977). Colony-specific song in *Cacicus cela* (Icteridae, Aves) - password  
488 hypothesis. *Ardea* 65, 197–202.
- 489 Fukuzawa, Y., Webb, W. H., Pawley, M. D. M., Roper, M. M., Marsland, S., Brunton, D. H., et  
490 al. (2020). Koe: Web-based software to classify acoustic units and analyse  
491 sequence structure in animal vocalizations. *Methods Ecol. Evol.* 11, 431–441.  
492 doi:10.1111/2041-210X.13336.

- 493 Graham, B. A., Heath, D. D., and Mennill, D. J. (2017a). Dispersal influences genetic and  
494 acoustic spatial structure for both males and females in a tropical songbird. *Ecol.*  
495 *Evol.* 7, 10089–10102. doi:10.1002/ece3.3456.
- 496 Graham, B. A., Heath, D. D., and Mennill, D. J. (2021). Female and male song exhibit both  
497 parallel and divergent patterns of cultural evolution: A long-term study of song  
498 structure and diversity in tropical wrens. *Ornithology* 138.  
499 doi:10.1093/ornithology/ukaa067.
- 500 Graham, B. A., Heath, D. D., Walter, R. P., Mark, M. M., and Mennill, D. J. (2018). Parallel  
501 evolutionary forces influence the evolution of male and female songs in a tropical  
502 songbird. *J. Evol. Biol.* 31, 979–994. doi:10.1111/jeb.13279.
- 503 Graham, B. A., Sandoval, L., Dabelsteen, T., and Mennill, D. J. (2017b). A test of the  
504 Acoustic Adaptation Hypothesis in three types of tropical forest: degradation of  
505 male and female Rufous-and-white Wren songs. *Bioacoustics* 26, 37–61.  
506 doi:10.1080/09524622.2016.1181574.
- 507 Greenwood, P. J. (1980). Mating systems, philopatry and dispersal in birds and  
508 mammals. *Anim. Behav.* 28, 1140–1162. doi:10.1016/S0003-3472(80)80103-5.
- 509 Hall, M. L. (2000). The function of duetting in magpie-larks: conflict, cooperation, or  
510 commitment? *Anim. Behav.* 60, 667–677. doi:10.1006/anbe.2000.1517.
- 511 Hall, M. L., Rittenbach, M. R. D., and Vehrencamp, S. L. (2015). Female song and vocal  
512 interactions with males in a neotropical wren. *Behav. Evol. Ecol.* 3, 12.  
513 doi:10.3389/fevo.2015.00012.
- 514 Hamers, L., Hemeryck, Y., Herweyers, G., Janssen, M., Keters, H., Rousseau, R., et al.  
515 (1989). Similarity measures in scientometric research: The Jaccard index versus  
516 Salton's cosine formula. *Inf. Process. Manag.* 25, 315–318. doi:10.1016/0306-  
517 4573(89)90048-4.
- 518 Heather, B. D., and Robertson, H. A. (2000). *The field guide to the birds of New Zealand*.  
519 Viking\Penguin Books.
- 520 Hill, S. D., Brunton, D. H., Anderson, M. G., and Ji, W. (2018). Fighting talk: complex song  
521 elicits more aggressive responses in a vocally complex songbird. *Ibis* 160, 257–  
522 268.
- 523 Illes, A. E. (2014). Context of female bias in song repertoire size, singing effort, and  
524 singing independence in a cooperatively breeding songbird. *Behav. Ecol.*  
525 *Sociobiol.*, 1–12. doi:10.1007/s00265-014-1827-3.
- 526 Irwin, D. E., Besch, S., Irwin, J. H., and Price, T. D. (2005). Speciation by distance in a ring  
527 species. *Science* 307, 414–416. doi:10.1126/science.1105201.
- 528 Janik, V. M., and Slater, P. J. (1997). Vocal learning in mammals. *Adv. Study Behav.* 26, 59–  
529 100.

- 530 Jenkins, P. F. (1978). Cultural transmission of song patterns and dialect development in a  
531 free-living bird population. *Anim. Behav.* 26, 50–78. doi:10.1016/0003-  
532 3472(78)90007-6.
- 533 Kroodsma, D., Hamilton, D., Sánchez, J. E., Byers, B. E., Fandiño-Mariño, H., Stemple, D. W.,  
534 et al. (2013). Behavioral Evidence for Song Learning in the Suboscine Bellbirds  
535 (*Procnias* spp.; Cotingidae). *Wilson J. Ornithol.* 125, 1–14. doi:10.1676/12-033.1.
- 536 Lachlan, R. F., Verzijden, M. N., Bernard, C. S., Jonker, P.-P., Koese, B., Jaarsma, S., et al.  
537 (2013). The progressive loss of syntactical structure in bird song along an island  
538 colonization chain. *Curr. Biol.* 23, 1896–1901. doi:10.1016/j.cub.2013.07.057.
- 539 Lande, R. (1980). Sexual dimorphism, sexual selection, and adaptation in polygenic  
540 characters. *Evolution* 34, 292–305. doi:10.2307/2407393.
- 541 Levin, R. N. (1996). Song behaviour and reproductive strategies in a duetting wren,  
542 *Thryothorus nigricapillus*: I. Removal experiments. *Anim. Behav.* 52, 1093–1106.  
543 doi:10.1006/anbe.1996.0257.
- 544 Logue, D. M., Droessler, E. E., Roscoe, D. W., Vokey, J. R., Rendall, D., and Kunimoto, R. M.  
545 (2007). Sexually antithetical song structure in a duet singing wren. *Behaviour*  
546 144, 331–350. doi:10.1163/156853907780425749.
- 547 Mann, N. I., Dingess, K. A., Barker, F. K., Graves, J. A., and Slater, P. J. B. (2009). A  
548 comparative study of song form and duetting in neotropical *Thryothorus* wrens.  
549 *Behaviour* 146, 1–43.
- 550 Mennill, D. J., and Rogers, A. C. (2006). Whip it good! Geographic consistency in male  
551 songs and variability in female songs of the duetting eastern whipbird *Psophodes*  
552 *olivaceus*. *J. Avian Biol.* 37, 93–100. doi:10.1111/j.0908-8857.2006.03548.x.
- 553 Mennill, D. J., and Vehrencamp, S. L. (2005). Sex differences in singing and duetting  
554 behavior of neotropical rufous-and-white wrens (*Thryothorus rufalbus*). *The Auk*  
555 122, 175–186. doi:10.1642/0004-8038(2005)122[0175:SDISAD]2.0.CO;2.
- 556 Odom, K. J., Hall, M. L., Riebel, K., Omland, K. E., and Langmore, N. E. (2014). Female song  
557 is widespread and ancestral in songbirds. *Nat. Commun.* 5.  
558 doi:10.1038/ncomms4379.
- 559 Paris, D., Nicholls, A. O., Hall, A., Harvey, A., and Massaro, M. (2016). Female-biased  
560 dispersal in a spatially restricted endemic island bird. *Behav. Ecol. Sociobiol.* 70,  
561 2061–2069. doi:10.1007/s00265-016-2210-3.
- 562 Parker, K. A., Anderson, M. J., Jenkins, P. F., and Brunton, D. H. (2012). The effects of  
563 translocation-induced isolation and fragmentation on the cultural evolution of  
564 bird song. *Ecol. Lett.* 15, 778–785. doi:10.1111/j.1461-0248.2012.01797.x.
- 565 Paton, J. A., Manogue, K. R., and Nottebohm, F. (1981). Bilateral organization of the vocal  
566 control pathway in the budgerigar, *Melopsittacus undulatus*. *J. Neurosci.* 1, 1279–  
567 1288.



- 568 Podos, J., and Warren, P. S. (2007). "The evolution of geographic variation in birdsong,"  
569 in *Advances in the Study of Behavior*, eds. H. J. Brockmann, T. J. Roper, M. Naguib,  
570 K. E. Wynne-Edwards, C. Barnard, and J. Mitani (Academic Press), 403–458.  
571 Available at:  
572 <http://www.sciencedirect.com/science/article/pii/S0065345407370095>.
- 573 Poole, J. H., Tyack, P. L., Stoeger-Horwath, A. S., and Watwood, S. (2005). Animal  
574 behaviour: elephants are capable of vocal learning. *Nature* 434, 455.
- 575 Potvin, D. A., and Clegg, S. M. (2015). The relative roles of cultural drift and acoustic  
576 adaptation in shaping syllable repertoires of island bird populations change with  
577 time since colonization. *Evolution* 69, 368–380. doi:10.1111/evo.12573.
- 578 Price, J. J. (2015). Rethinking our assumptions about the evolution of bird song and other  
579 sexually dimorphic signals. *Behav. Evol. Ecol.* 3, 40. doi:10.3389/fevo.2015.00040.
- 580 Riebel, K., Lachlan, R. F., and Slater, P. J. B. (2015). "Chapter Six - Learning and Cultural  
581 Transmission in Chaffinch Song," in *Advances in the Study of Behavior*, eds. M.  
582 Naguib, H. J. Brockmann, J. C. Mitani, L. W. Simmons, L. Barrett, S. Healy, et al.  
583 (Academic Press), 181–227. doi:10.1016/bs.asb.2015.01.001.
- 584 Riebel, K., Odom, K. J., Langmore, N. E., and Hall, M. L. (2019). New insights from female  
585 bird song: towards an integrated approach to studying male and female  
586 communication roles. *Biol. Lett.* 15, 20190059.
- 587 Roper, M. M. (2018). Sexual dimorphism of song and life history trade-offs in the New  
588 Zealand bellbird: a thesis presented in partial fulfilment of the requirements for  
589 the degree of Doctor of Philosophy (Ph. D.) in Ecology at Massey University,  
590 Albany, New Zealand.
- 591 Roper, M. M., Harmer, A. M. T., and Brunton, D. H. (2018). Developmental changes in  
592 song production in free-living male and female New Zealand bellbirds. *Anim.*  
593 *Behav.* 140, 57–71. doi:10.1016/j.anbehav.2018.04.003.
- 594 Sanvito, S., Galimberti, F., and Miller, E. H. (2007). Observational evidences of vocal  
595 learning in southern elephant seals: a longitudinal study. *Ethology* 113, 137–146.  
596 doi:10.1111/j.1439-0310.2006.01306.x.
- 597 Sayigh, L. S., Esch, H. C., Wells, R. S., and Janik, V. M. (2007). Facts about signature  
598 whistles of bottlenose dolphins, *Tursiops truncatus*. *Anim. Behav.* 74, 1631–1642.  
599 doi:10.1016/j.anbehav.2007.02.018.
- 600 Sokal, R. R. (1958). A statistical method for evaluating systematic relationship. *Univ.*  
601 *Kans. Sci. Bull.* 28, 1409–1438.
- 602 Tobias, J. A., Montgomerie, R., and Lyon, B. E. (2012). The evolution of female ornaments  
603 and weaponry: social selection, sexual selection and ecological competition.  
604 *Philos. Trans. R. Soc. Lond. B Biol. Sci.* 367, 2274–2293.  
605 doi:10.1098/rstb.2011.0280.

- 606 Webb, W. H., Brunton, D. H., Aguirre, J. D., Thomas, D. B., Valcu, M., and Dale, J. (2016).  
 607 Female song occurs in songbirds with more elaborate female coloration and  
 608 reduced sexual dichromatism. *Front. Ecol. Evol.* 4, 22.
- 609 Whitehead, H., and Rendell, L. (2014). *The cultural lives of whales and dolphins*.  
 610 University of Chicago Press.
- 611 Wickler, W., and Seibt, U. (1980). Vocal duetting and the pair bond. *Z. Für Tierpsychol.* 52,  
 612 217–226. doi:10.1111/j.1439-0310.1980.tb00713.x.
- 613 Wickler, W., and Seibt, U. (1988). “Gender dialects” — a new phenomenon from birdsong  
 614 epigenesis. *Naturwissenschaften* 75, 51–52. doi:10.1007/BF00367445.
- 615
