1 Sexually distinct song  
2 cultures in a songbird  
3 metapopulation

4 Wesley H. Webb<sup>1\*</sup>, Michelle M. Roper<sup>1</sup>, Matthew D. Pawley<sup>1</sup>, Yukio Fukuzawa<sup>1</sup>, Aaron M.  
5 Harmer<sup>1</sup>, Dianne H. Brunton<sup>1</sup>

6  
7  
8  
9  
10

11 <sup>1</sup>School of Natural and Computational Sciences, Massey University, Auckland, New  
12 Zealand

13 \*Corresponding author. Email [wesleythewebb@gmail.com](mailto:wesleythewebb@gmail.com)

14  
15  
16 Keywords: Female song, dialects, cultural evolution, birdsong, avian, bioacoustics

## 17 **Abstract**

18 Songbirds learn their songs culturally, through imitating tutors. The vocal culture of a  
19 songbird population changes as new song units (syllables) are introduced through  
20 immigration, copying errors, and innovation, while other syllables fall out of use. This  
21 leads to a diversification of the syllable pool across the species, much like the  
22 diversification and spatial patterns of human language. Vocal cultures have been well  
23 studied in male songbirds but have been largely overlooked in females. In particular, few  
24 studies compare spatial variation of male and female song cultures. Here we undertake  
25 one of the first comparisons of male and female song culture in birds, analysing song data  
26 from a metapopulation of New Zealand bellbirds *Anthornis melanura*, spanning an  
27 archipelago of six islands. Having classified 20,700 syllables, we compare population  
28 syllable repertoire sizes and overlap between sites and sexes. We show that males and  
29 females—both with complex songs—have distinct song cultures, sharing only 6–26% of  
30 syllable types within each site. Furthermore, male and female syllable types can be  
31 statistically discriminated based on acoustic properties. Despite diverse syllable  
32 repertoires within sites, few syllable types were shared between sites (both sexes had  
33 highly distinct site-specific dialects). For the few types shared between sites, sharing  
34 decreased with distance only for males. Overall, there was no significant difference  
35 between sexes in degree of site–site repertoire overlap. These results suggest different  
36 cultural processes at play for the two sexes, underlining the inadequacy of male-centric  
37 song research and calling for comparisons of male and female song cultures in many more  
38 species.

## 39 **Introduction**

40 Culture is shared information or behaviour acquired through social learning from  
41 conspecifics (Dawkins, 1976), involving the transmission of *memes* (units of culture) by  
42 behavioural imitation. Vocal culture—the social learning of acoustic memes—has so far  
43 been observed in songbirds (oscines; Passeri), some suboscines (*Procnias* spp.,  
44 Cotingidae), parrots, hummingbirds, cetaceans, elephants, seals, bats, and humans (Paton  
45 et al., 1981; Baptista and Schuchmann, 1990; Janik and Slater, 1997; Poole et al., 2005;  
46 Sanvito et al., 2007; Catchpole and Slater, 2008; Kroodsma et al., 2013). In these taxa, the  
47 vocal repertoire of a population changes as new memes are introduced through  
48 immigration, copying errors, and innovation, while other memes fall out of use (Catchpole  
49 and Slater, 2008). This leads to a diversification of the meme pool across the species, much  
50 like the diversification of human language—resulting in dialects (Podos and Warren,  
51 2007).

52 Despite the high volume of studies on male birdsong culture and dialects (Jenkins, 1978;  
53 Whitehead and Rendell, 2014; Aplin, 2019), little is known about female song culture. This  
54 is partly due to a northern-hemisphere-biased view of sexual selection that emphasises  
55 male-male competition and female choice in driving elaborate traits in males (Darwin,  
56 1871), but which does not provide a framework for understanding elaborate female traits  
57 (Riebel et al., 2019). Female song (and other elaborate female traits) have been  
58 overlooked as non-functional aberrations, resulting ‘accidentally’ from shared genetic  
59 architecture with males (Darwin, 1871; Lande, 1980; see Tobias et al., 2012 for review).  
60 This view has now been roundly discounted. Female song is present in 64% of surveyed  
61 songbird species (Webb et al., 2016), has been recovered as the ancestral state (Odom et  
62 al., 2014), can evolve independently of the male song phenotype (Price, 2015) and has

63 female-specific functions in territory and resource defence, mate attraction, mate defence,  
64 and pair bonding (reviewed in Austin et al., 2021).

65 Overlooking females has impeded development of a more general theory that explains  
66 song culture in both sexes. For instance, the possibility that females have song cultures  
67 distinct from conspecific males, with different geographic patterns of song sharing, has  
68 hardly been investigated at a population level (Graham et al., 2017a).

69 Studies have reported a wide degree of sexual song dimorphism in songbirds, from  
70 identical repertoires for males and females at one extreme [e.g., forest weaver *Symplectes*  
71 *bicolor* (Wickler and Seibt, 1980), magpie lark *Grallina cyanoleuca* (Hall, 2000)], to  
72 completely non-overlapping repertoires at the other [e.g., many duetting wrens; (Brown  
73 and Lemon, 1979; Levin, 1996; Mann et al., 2009)]. However, studies comparing the sexes  
74 have mostly focused on within-pair repertoires in duetting species. To our knowledge,  
75 only four studies (of just two species) have compared spatial variation of male and female  
76 songs at a population level.

77 First, Mennill and Rogers (2006) examined the songs of duetting male and female eastern  
78 whipbird *Psophodes olivaceus* across their geographic range. While male whipbird song  
79 was highly consistent over space, female song showed pronounced variation, with  
80 multiple distinct song types. The authors suggest eastern whipbirds have undergone a  
81 decoupling of male and female song learning strategies in response to different sex-  
82 specific selection pressures.

83 Three later studies on rufous-and-white wrens (Graham et al., 2017a, 2018a, 2021)  
84 showed that song cultures of males and females can be similar in complexity, and appear  
85 to evolve in similar directions via acoustic adaptation and cultural drift. However, males  
86 and females differ in the relationship between dispersal distance and song-sharing with

87 parents (Graham et al., 2017a), the speed of cultural change, and the relationship between  
88 immigration rate and cultural diversity (Graham et al., 2021).

89 We know of no other studies to examine spatial variation in song culture at a population  
90 level, comparing both sexes.

91 The New Zealand bellbird *Anthornis melanura*—hereafter ‘bellbird’—provides an ideal  
92 system for comparing male and female song cultures over space. The bellbird is a non-  
93 duetting endemic honeyeater (Family Meliphagidae) with complex, geographically  
94 diverse song in both sexes, and probable open-ended learning (Roper, 2018). Bellbird  
95 populations occur across a network of islands and peninsulas in the Hauraki Gulf,  
96 northeastern New Zealand. Population connectivity is substantial, and regulated by  
97 geographic isolation (Baillie, 2011; Baillie et al., 2014). Females disperse more frequently  
98 than males, resulting in higher female connectivity between sites (as typical for songbirds:  
99 Greenwood, 1980; Clarke et al., 1997; Paris et al., 2016).

100 In this paper, we seek to advance understanding of female birdsong culture by comparing  
101 the patterns of male and female meme sharing across a network of six island and  
102 peninsula populations (Figure 1). Our questions are:

103 (1) *Are there sexual differences in population syllable repertoire size?*

104 (2) *How much do male and female population repertoires overlap?*

105 (3) *What is the pattern of syllable type sharing between sites?*

106 If geographic proximity drives cultural connectivity between islands, we expect sites that  
107 are closer together will share more memes (i.e., an isolation-by-distance pattern in vocal  
108 culture). We also expect higher female dispersal frequency will result in higher meme flow  
109 between sites, and thus higher sharing of syllable types between sites than for males.

110

111

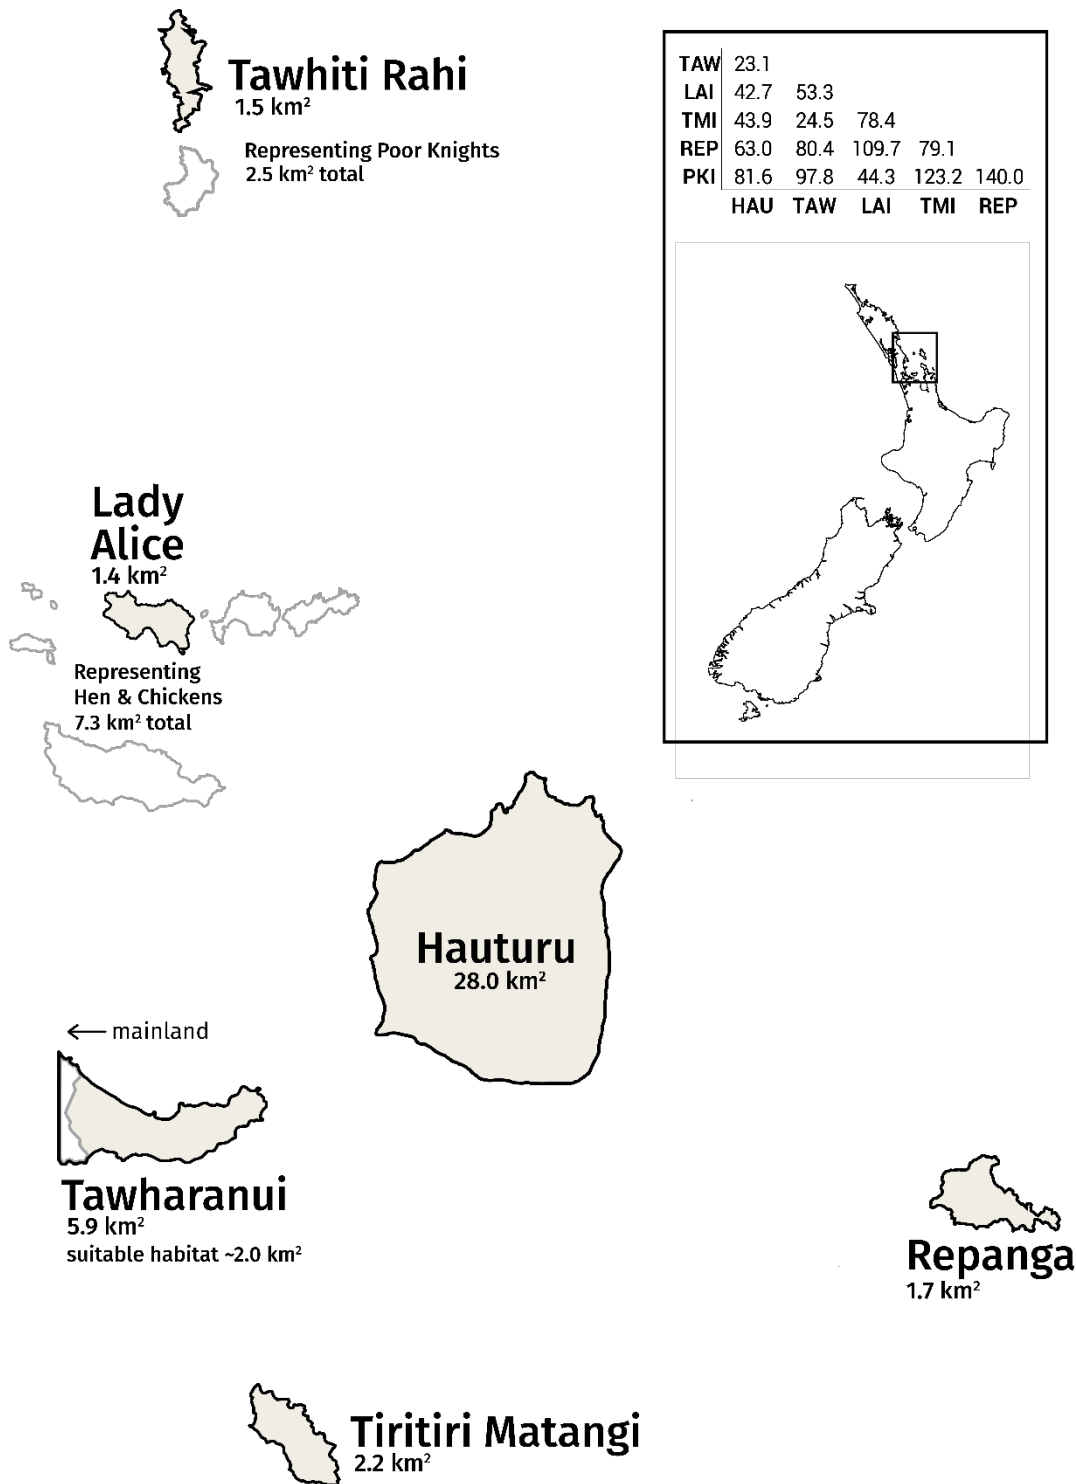

112

113 **Figure 1—Simplified map of the Hauraki Gulf archipelago, home to a metapopulation of bellbirds.**

114 Tawhiti Rahi represents the Poor Knights Islands group; likewise, Lady Alice Island represents the Hen

115 and Chickens Islands group. The other islands of these wider groups are shown in white. The distance

116 matrix between sites (measured in km) is provided (HAU, Hauturu; TAW, Tawharanui; LAI, Lady Alice;  
117 TMI, Tiritiri Matangi; REP, Repanga, PKI, Tawhiti Rahi). Distances are not to scale on simplified map.

118

## 119 **Methods**

### 120 **Creating the song database**

#### 121 **Recording bellbird song**

122 Recording trips were conducted to six island and mainland peninsula sites in the Hauraki  
123 Gulf 2013–2017 (Table 1), with iwi consent (Ngatiwai, Ngati Manuhiri) and permits from  
124 the New Zealand Department of Conservation (47948–FAU, 34833–FAU, 41756–FAU,  
125 48000–FAU) and Massey University Animal Ethics Committee (permit number 15/21).  
126 The sites were chosen based on their large bellbird populations (good return for sampling  
127 effort) and their variety in connectivity. A team of 1–5 recordists per site collectively spent  
128 a total of over 1,000 recordist-hours actively tracking and recording wild bellbirds (per  
129 site: Tawhiti Rahi, 108; Lady Alice, 110; Hauturu, 140; Tawharanui, 132; Repanga, 260;  
130 Tiri, many hundreds of hours), with Marantz PMD661 portable solid-state recorders  
131 paired with handheld Sennheiser ME-66 shotgun microphones. Recordists coordinated  
132 movement to sample sites systematically and with maximal coverage, gathering 2,137  
133 high-quality recorded songs (discrete vocalisation bouts) by adult individuals of known  
134 sex, during daylight hours. During recording, metadata including identity, age and sex of  
135 the focal bird was spoken into the microphone for later transcription.

**Table 1—Geographic and sampling information for the six study sites.**

Tawhiti Rahi represents the larger Poor Knights Islands group; likewise, Lady Alice Island represents the larger Hen & Chickens Islands group. Elevation data is from [www.topomap.co.nz](http://www.topomap.co.nz). In the *Sample size* column, M=male and F=female. Recording on Hauturu was restricted to an area ~3 km<sup>2</sup>.

| Sites                                                         | GPS Coordinates           | Area (km <sup>2</sup> )                             | Elevation                    | Recording dates and number of recordists                                       | Sample size                                |
|---------------------------------------------------------------|---------------------------|-----------------------------------------------------|------------------------------|--------------------------------------------------------------------------------|--------------------------------------------|
| Tawhiti Rahi<br>(representing Poor Knights Island group)      | 35°28'06"S<br>174°44'13"E | 1.5<br>(2.5 including neighbouring island, Aorangi) | 191 m<br>(216 m for Aorangi) | Single trip 23/02/2017–27/02/2017<br>3 recordists                              | Birds: 128 M, 48 F<br>Songs: 309 M, 61 F   |
| Lady Alice (represents larger Hen and Chickens Islands group) | 35°53'23"S<br>174°43'41"E | 1.4 (7.3 including entire Hen and Chickens group)   | 158 m<br>(417 m for Hen)     | Single trip 27/05/2015–30/05/2015<br>4 recordists                              | Birds: 149 M, 116 F<br>Songs: 181 M, 126 F |
| Hauturu                                                       | 36°11'57"S<br>175°04'53"E | 28.0                                                | 722 m                        | Single trip 05/04/2016–09/04/2016<br>4 recordists                              | Birds: 57 M, 63 F<br>Songs: 67 M, 98 F     |
| Tawharanui                                                    | 36°22'20"S<br>174°50'30"E | 5.9                                                 | 91 m                         | 20/04/2016, 18/08/2016,<br>01/09/2016–07/09/2016, 22/09/2016<br>1–3 recordists | Birds: 66 M, 26 F<br>Songs: 206 M, 37 F    |
| Repanga                                                       | 36°26'11"S<br>175°46'16"E | 2.0                                                 | 214 m                        | Single trip 03/11/2016 – 09/11/2016<br>5 recordists                            | Birds: 122 M, 141 F<br>Songs: 328 M, 196 F |
| Tiritiri Matangi                                              | 36°36'01"S<br>174°53'24"E | 2.2                                                 | 80 m                         | Frequent recordings in non-winter months 2013–2015<br>1–2 recordists           | Birds: 91 M, 58 F<br>Songs: 389 M, 138 F   |



## 136 **Segmenting songs into syllables**

137 Songs were imported into a database in *Koe* bioacoustics software (Fukuzawa et al., 2020)  
138 and manually segmented into syllables by visually inspecting the spectrogram and setting  
139 syllable start/end points. Bellbirds mostly sing in discrete units that are easy to demarcate  
140 as syllables based on a gap either side. Occasionally there are fast-paced bursts where it  
141 is not clear where one unit ends and another begins; in these cases sounds were grouped  
142 together as a syllable if they were separated by less than 15 ms of silence. This value was  
143 chosen through trial and error for the best consistency of syllable groupings.

## 144 **Classifying syllables**

145 To prepare for classification, the 20,700 segmented syllables were ranked by acoustic  
146 similarity in *Koe*. Similarity was calculated by extracting all available acoustic features  
147 for each unit and applying the UPGMA method (Sokal, 1958); see  
148 <https://github.com/fzyukio/koe/wiki> for details of extracted features and similarity  
149 index calculation.

150 WHW then compared syllables visually and aurally to classify them into types based on  
151 just-noticeable differences in pitch, timbre, and duration of the playback and visual  
152 appearance of the spectrogram. Manual perception-based classification is considered  
153 excellent for acoustic classification (Sayigh et al., 2007; Duda et al., 2012) and allowed  
154 finer scale than automated classification methods, such as multi-dimensional scaling  
155 (MDS) or principal component analysis (PCA). The high acuity of bird hearing relative to  
156 humans (Dooling, 2004) justifies a fine-scale classification approach. We validated our  
157 classification by having 74 inexperienced judges independently label a subset of  
158 syllables. Average match with our own labels was 89.6% (median 95.6%); see Fukuzawa  
159 et al. (2020) and Article S1A for more details.

## 160 **Sex differences in population-level repertoires**

### 161 **Male and female syllable diversity**

162 The raw number of syllable types recorded at each site are not directly comparable, due  
163 to the inevitable confounding of different sampling effort. To account for this, we used the  
164 statistical software *EstimateS* (Colwell, 2013) to produce syllable type accumulation  
165 curves and extrapolate the true number of syllable types at each site (Article S1B).

### 166 **Repertoire overlap of male and female population sectors**

167 For each site we calculated the percentage overlap between male and female population  
168 repertoires, using the Jaccard similarity index (Hamers et al., 1989): the number of shared  
169 types divided by the total number of types.

170 Next, the acoustic feature measurements of all syllables (previously extracted to aid  
171 classification in *Koe*) were normalised by mean-centering and dividing by standard  
172 deviation. To test whether male-only, female-only, and shared syllable types form three  
173 distinguishable clusters in acoustic space, we classified syllables using a linear  
174 discriminant analysis (LDA) on the data, with leave-one-out cross-validation. If male-only,  
175 female-only, and shared syllables are randomly interspersed in acoustic space, then the  
176 LDA classification results will be similar to random assignment of groups. If the three  
177 groups occupy more distinct ranges, then the LDA classification will perform much better  
178 than random assignment.

### 179 **The pattern of syllable type sharing between sites**

180 We calculated repertoire overlaps between sites, for all pairwise combinations of site  
181 lists—comparing males against males, females against females. For each sex we tested for  
182 an isolation-by-distance pattern in repertoire overlaps between sites, in two ways.

183 First, we conducted a Hauturu-centric analysis. The large size, geographic centrality, and  
184 the long-term persistence of the Hauturu bellbird population make it likely to be a  
185 substantial source of dispersing bellbirds to other sites in the Hauraki Gulf archipelago.  
186 We calculated Spearman's rank correlation coefficients between *population repertoire*  
187 *overlap with Hauturu* against *geographic distance from Hauturu*.

188 Next, to test for an overall isolation-by-distance pattern, we calculated Spearman's rank  
189 correlation coefficients between *percentage of site–site repertoire overlap* against *site–site*  
190 *geographic distance*, for all pairwise combinations of sites in the archipelago. In this case,  
191 to account for non-independence of points (being pairwise combinations), we used the  
192 RELATE routine in *PRIMER* (version 7, Clarke and Gorley, 2015) with 9999 permutations.  
193 To test whether males or females share more syllables between sites overall, we used a  
194 two-tailed Sign Test (Dixon and Mood, 1946), with null hypothesis: the degree of site–site  
195 sharing is equal between sexes (Article S1C).

## 196 **Results**

### 197 **Sex differences in population repertoires**

#### 198 **Male and female syllable diversity**

199 Across the metapopulation we recorded a total of 702 syllable types: 337 male-only, 203  
200 female-only, and 162 shared. See Data S1 and Table S1 for a complete catalogue.

201 For each site and sex, the syllable type accumulation curve levelled off nearly or  
202 completely by 500 songs (i.e., approximating the true number of syllable types present),  
203 allowing meaningful comparison of syllable diversity (Figure S1).

204 We found no evidence of a difference in repertoire size for males versus females within  
205 sites; 95% confidence intervals overlap for males and females in all cases (Table 2). There  
206 was high variability between sites for both sexes, with male point estimates ranging from  
207 80 (Repanga) to 186 (Hauturu) and females from 81 (Repanga) to 186 (Hauturu).

## 208 **Repertoire overlap of male and female population sectors**

209 Male and female population sectors had largely separate repertoires, ranging from 6%  
210 total units shared at Tawhiti Rahi to 26% shared at Hauturu (Figure 2, Table S2). In other  
211 words, 74–94% of syllable types at each site were sung by one sex only.

212

### 213 **Table 2—Extrapolated estimates of male and female syllable diversity within sites.**

214 Estimated number of syllable types at 500 songs, for male and female population sectors at each site.  
215 Ninety-five-percent confidence intervals are in brackets. Calculated with the statistical software *Estimate*  
216 *S* (Colwell, 2013).

---

| <b>Site</b>           | <b>Male</b>                                 | <b>Female</b>                             |
|-----------------------|---------------------------------------------|-------------------------------------------|
| Tawhiti Rahi          | <b>135</b> (121–149)<br><i>n</i> =306 songs | <b>119</b> (68–169)<br><i>n</i> =58 songs |
| Lady Alice            | <b>143</b> (118–169)<br><i>n</i> =181       | <b>128</b> (93–163)<br><i>n</i> =125      |
| Hauturu               | <b>186</b> (139–234)<br><i>n</i> =67        | <b>186</b> (151–220)<br><i>n</i> =98      |
| Tawharanui            | <b>116</b> (103–129)<br><i>n</i> =204       | <b>89</b> (48–130)<br><i>n</i> =37        |
| Repanga               | <b>80</b> (72–89)<br><i>n</i> =328          | <b>81</b> (65–97)<br><i>n</i> =196        |
| Tiri 2013, 2014, 2015 | <b>165</b> (152–178)<br><i>n</i> =389       | <b>145</b> (115–175)<br><i>n</i> =138     |

---

217

## Syllable types

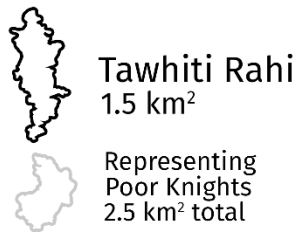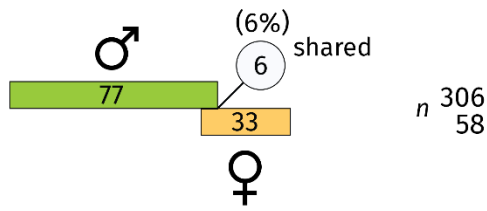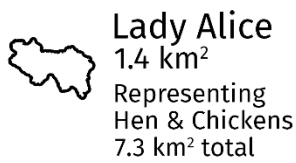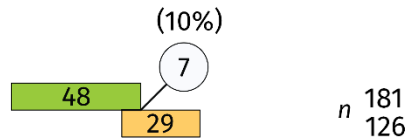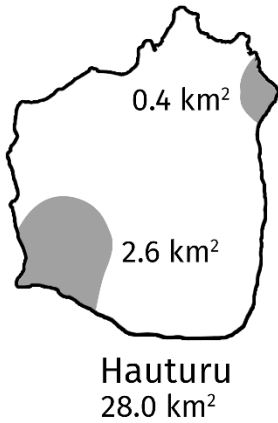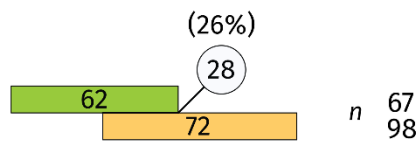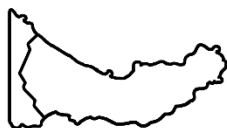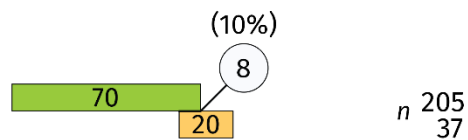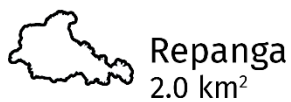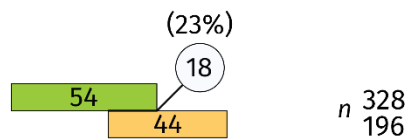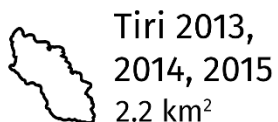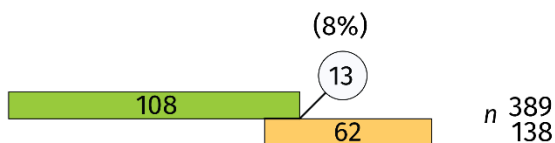

219 **Figure 2—Overlap of male and female population syllable repertoires.**

220 Each diagram indicates the recorded number of male (green bar) and female (orange bar) syllable types,  
221 and the number of types common to both sexes (circle). The percentage overlap is given above the circle,  
222 calculated as the Jaccard similarity index: number of shared types divided by total number of types. For  
223 robustness, repertoires exclude types with fewer than three occurrences within that site-and-sex group.  
224 Bar length is proportional to the number of syllable types, and overlap length is proportional to the  
225 number of shared syllable types. Sample sizes (number of songs) for the male and female bars are given to  
226 the right of the bars. Note that repertoire sizes are recorded values, not extrapolated, and therefore are  
227 not directly comparable due to differing sample sizes. However, relative overlap percentage is more  
228 robust to differing sample sizes and thus meaningful to compare. Site outlines on the left of the figure are  
229 to scale. The shaded grey area in the Hauturu outline indicates the sampled region of the island.

230

231 In the Linear Discriminant Analysis (LDA) ordination, male-only and female-only syllables  
232 form two clear, partially-overlapping clusters, with shared syllables in between, when  
233 data from all sites are pooled. For individual sites the configuration of the three clusters  
234 varies but shows a tendency for female-only syllables to occur at lower LD1 values, male-  
235 only to occur at higher LD1 values, with shared syllables in between.

236 Success of the LDA leave-one-out classifier had an overall *lift* of 1.78; that is, the LDA  
237 assigned labels (male-only, female-only and shared) to syllables overall 1.78 times better  
238 than random allocation of labels. Lift was 1.51 for male-only syllables, 3.99 for female-  
239 only syllables, and 2.15 for shared syllables. P values for all lift tests were <0.001; i.e., in  
240 all cases none of the 4999 null distributions had a lift as large as the observed lift.  
241 Therefore, male-only, female-only, and shared types can be separated on the basis of  
242 acoustic features.

243

244

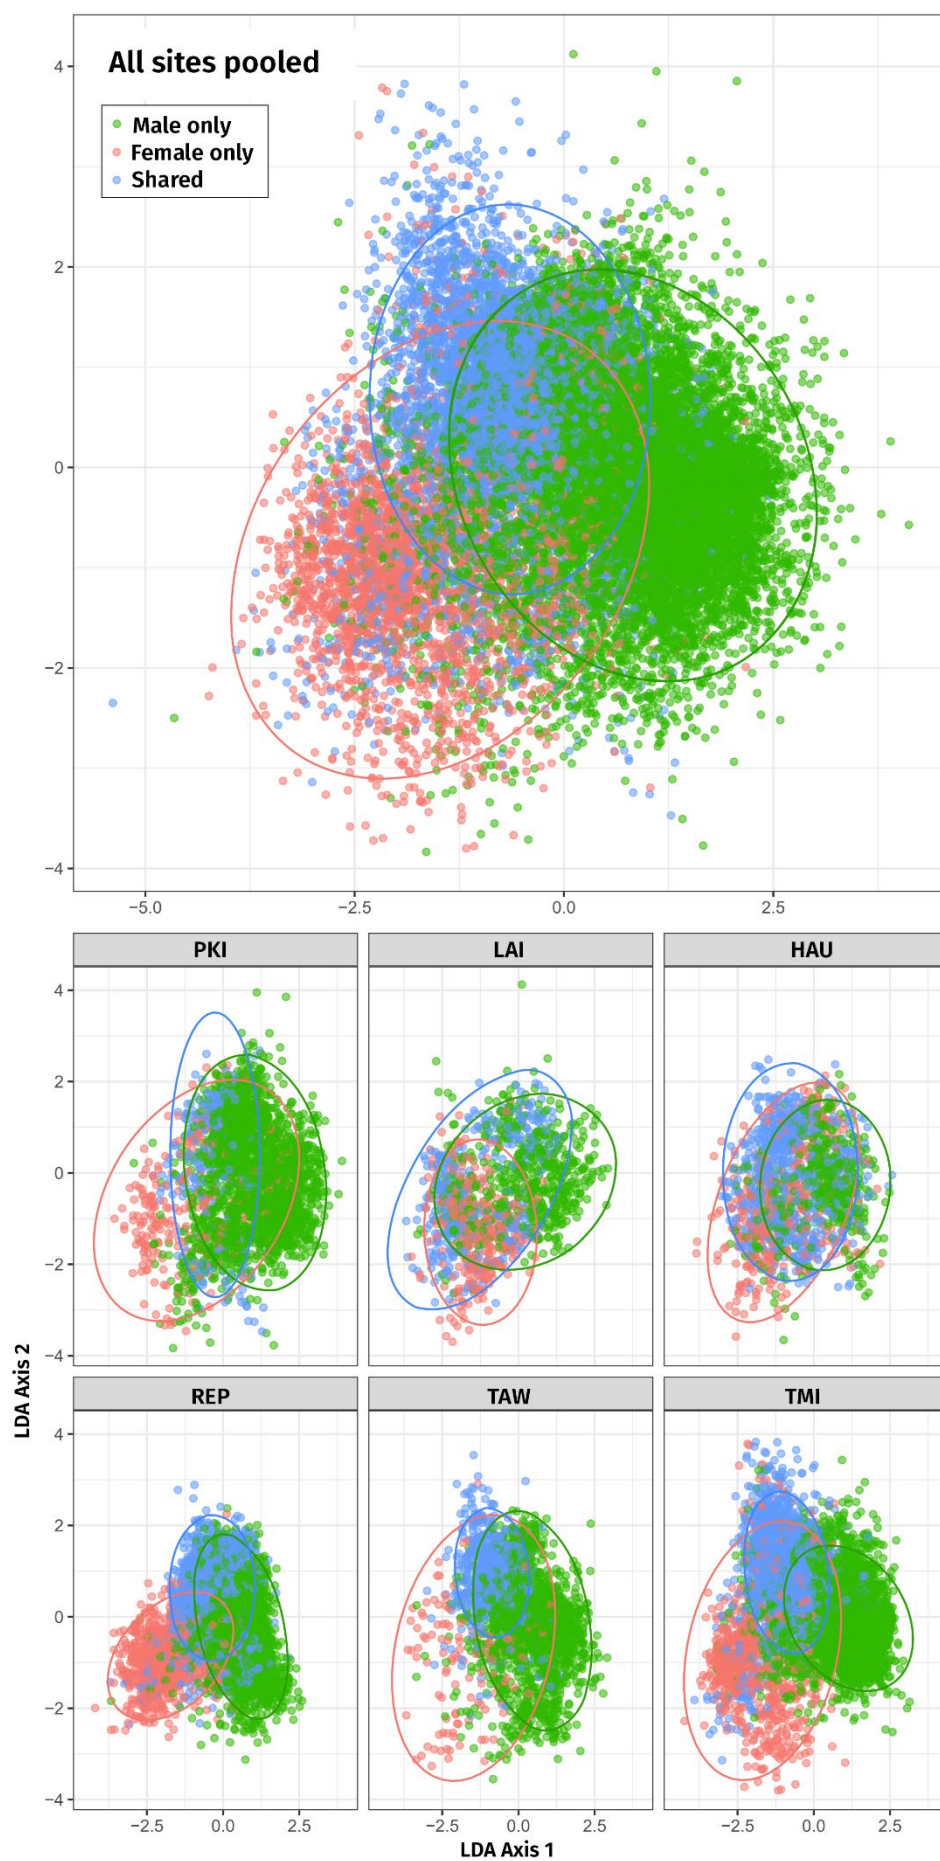

246

247 **Figure 3—Two-dimensional linear discriminant analysis (LDA) of male-only, female-only, and**  
248 **shared syllables for all sites combined (top) and each site separately (bottom).**

249 Ellipses represent the regions covering 95% of the data (according to the fitted normal). Each site is  
250 plotted using the same axes to be comparable. Site abbreviations are as follows: PKI, Tawhiti Rahi,  
251 representing Poor Knights Islands; LAI, Lady Alice Island, representing Hen & Chickens; HAU, Hauturu;  
252 REP, Repanga; TAW, Tawharanui; TMI, Tiri.

253

254

## 255 **The pattern of meme sharing between sites**

### 256 **Site–site repertoire overlap**

257 Matrices of site–site repertoire overlap are presented in Figure 4. The degree of site-site  
258 repertoire overlap between male populations was low, ranging 3–18% (median=6%); for  
259 females: 1–12% (median=5%). Remarkably, for both sexes, the syllable types shared  
260 between sites were almost exclusively pure-tone whistle syllables or simple stutter-like  
261 syllables. The one exception was Hauturu–Tawharanui, which additionally shared some  
262 more complex types following the recent Hauturu→Tawharanui founder event (Brunton  
263 et al., 2008). See Data S1 and Data S2.

264

265



266

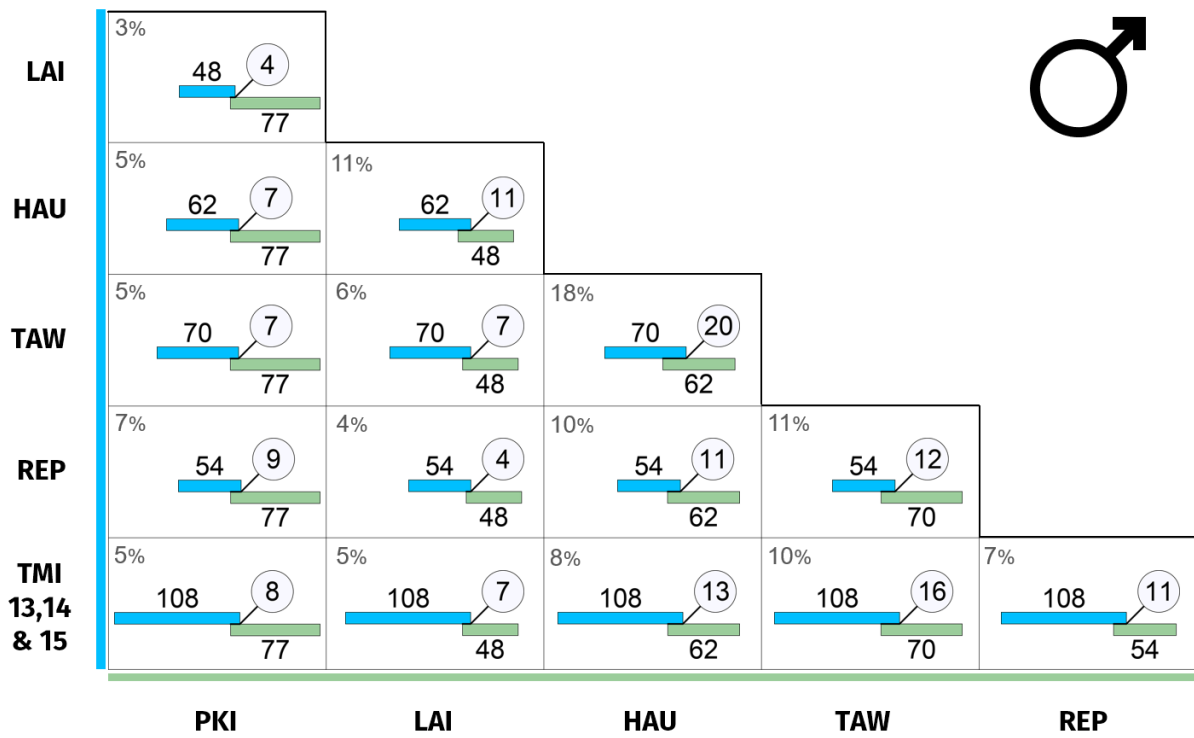

267

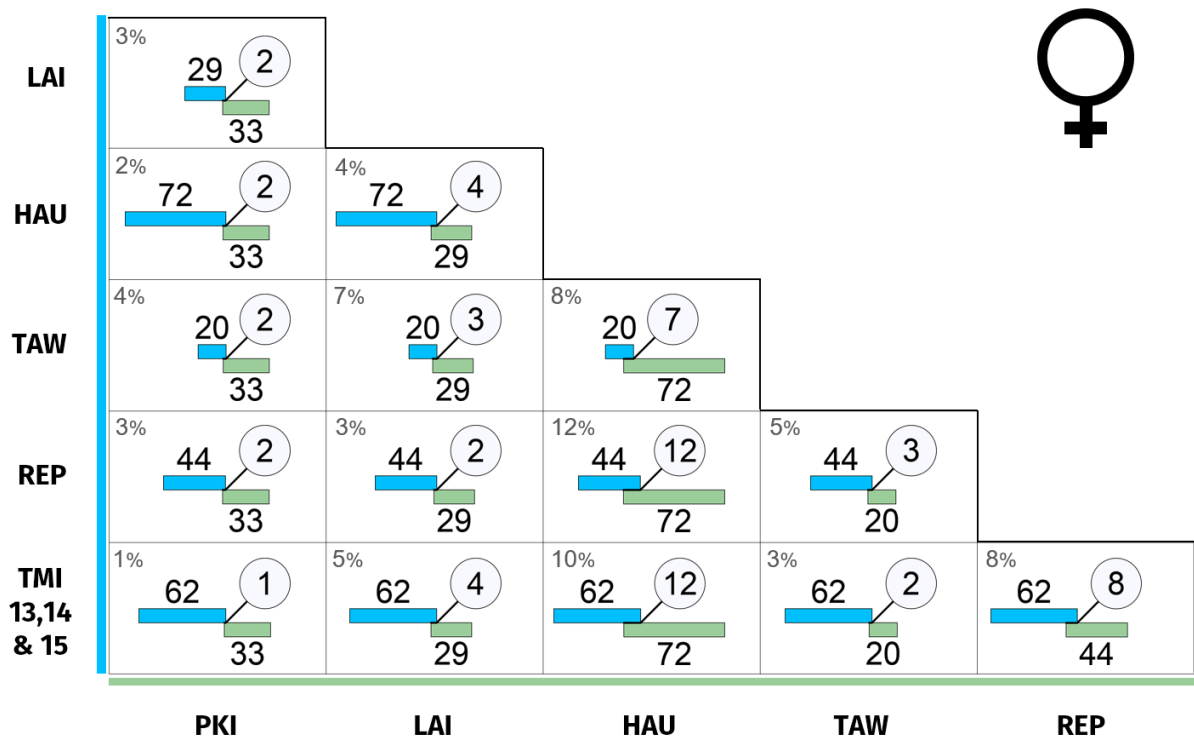

268

269

270

271 **Figure 4—(Top) Male population repertoire overlap between sites. (Bottom) Female population**  
272 **repertoire overlap between sites.**

273 Each cell indicates the recorded number of syllable types for the two sites (blue and green bars), and the  
274 number of types common to both (circle). The percentage overlap is given at the top left of each cell and is  
275 calculated as Jaccard similarity index: number of shared types divided by total number of types. For  
276 robustness, repertoires exclude types with fewer than three occurrences within that site and sex. Bar  
277 length is proportional to the number of syllable types, and overlap length is proportional to the shared  
278 number of syllable types. Site abbreviations are as follows: PKI, Tawhiti Rahi (representing Poor Knights  
279 Islands); LAI, Lady Alice Island (representing Hen and Chickens); HAU, Hauturu; TAW, Tawharanui; REP,  
280 Repanga; TMI, Tiri.

281

282 **Repertoire overlap versus distance**

283 The relationship between repertoire overlap with Hauturu versus geographic distance  
284 from Hauturu is shown in Figure 5A. There was a negative correlation between sharing  
285 and distance for males ( $r_s = -0.90$ ,  $df=3$ ,  $0.03 < P < 0.05$ ) but no relationship for females ( $r_s$   
286  $= -0.10$ ,  $df=3$ ,  $P > 0.10$ ). Contrary to predictions, sites at increasing distances from Hauturu  
287 did not share a progressively diminishing subset of syllable types with Hauturu, but  
288 different (apparently unrelated) subsets; this was true for both males and females (Data  
289 S2).

290 When considering sharing between *all* pairwise combinations of sites in the archipelago  
291 (Figure 5B), we did not find evidence of an isolation-by-distance pattern, for males ( $\rho =$   
292  $-0.525$ ,  $P = 0.064$ ) or females ( $\rho = -0.525$ ,  $P = 0.076$ ).

293 The recent founder event, where bellbirds from Hauturu colonised Tawharanui (Brunton  
294 et al., 2008) could possibly inflate the degree of sharing between the two sites, compared  
295 to other sites where both populations are well established. Therefore we tested  
296 robustness of the correlations to removal of the Hauturu–Tawharanui datapoint, but  
297 found little change in the slope or strength of the correlations.

298 There was no evidence of an overall difference between males and females in the degree  
299 of site-site repertoire overlap; out of 15 site-site comparisons, males shared a higher  
300 percentage of syllables than females in 9 cases, lower in 4 cases, and equal in two cases  
301 (Sign Test  $P = 0.17$ ).

302

303

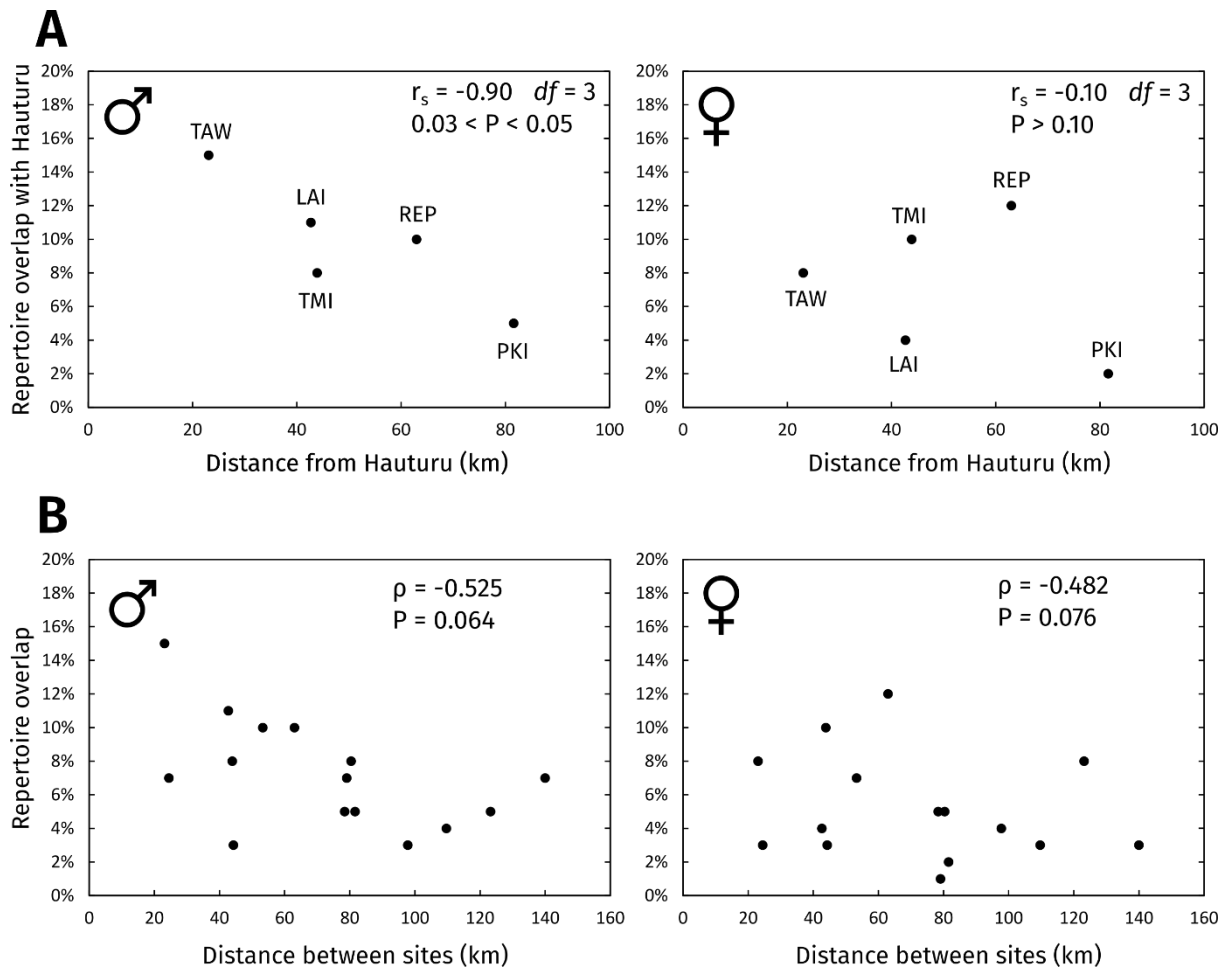

304

305

306 **Figure 5—Repertoire overlap versus distance between sites.**

307 **(A)** Repertoire overlap of all subpopulations with Hauturu versus their distance from Hauturu. Overlaps  
308 were calculated on repertoire lists of types with 3+ occurrences within each site-and-sex group. Site  
309 abbreviations: TAW, Tawharanui; LAI, Lady Alice Island (representing Hen and Chickens); TMI, Tiri; REP,  
310 Repanga; PKI, Tawhiti Rahi (representing Poor Knights Islands). **(B)** Site-site repertoire overlap versus  
311 site-site geographic distance, for all pairs of sites. Spearman's rank correlation coefficients ( $r_s$ ) were  
312 calculated using the RELATE routine in *PRIMER* (version 7) with 9999 permutations, accounting for the  
313 non-independence of points.

314

315

316

## 317 Discussion

318 This is one of the first comparisons of male and female song cultures across a  
319 metapopulation (Mennill and Rogers, 2006; Graham et al., 2018a, 2018b, 2021). We found  
320 that male and female bellbirds have comparable repertoire sizes (at a population level;  
321 Table 2), and sexually distinct vocal cultures, sharing only a small percentage of syllable  
322 types between sexes (6–26% within each site; Figure 2). Whether a type is male-specific,  
323 female-specific, or shared between sexes can be predicted based on its acoustic properties  
324 (Figure 3). Furthermore, song cultures of both sexes differ dramatically between sites—  
325 demonstrating male and female song dialects (Figure 4, Data S1). Despite a large and  
326 varied repertoire *within* sites, generally the only types shared *between* sites were flat-  
327 contour, pure-tone whistle syllables (Article S1A) or simple stutter-like syllables.  
328 Between-site sharing of these syllable types decreased with distance for males but not  
329 females. These contrasting patterns of sharing across the archipelago may result from sex  
330 differences in dispersal, meme mutation rates and song-learning modes.

331 Comparisons of male and female repertoire sizes typically focus on individual-level  
332 repertoires. Such studies have found smaller female repertoires in some cases (e.g.,  
333 rufous-and-white wrens *Thryophilus rufalbus*, Mennill and Vehrencamp, 2005; banded  
334 wrens *Thryophilus pleurostictus*, Hall et al., 2015), equal-sized repertoires in other cases  
335 (e.g., bay wren *Thryothorus nigricapillus*, Levin, 1996), and at least one case of larger  
336 female repertoire size (stripe-headed sparrow *Peucaea r. ruficauda*, Illes, 2014). The  
337 drivers of individual repertoire size are thought to differ between sexes, with males under  
338 selection from male–male competition and female choice (Catchpole, 1987; Hill et al.,  
339 2018), and females perhaps primarily from female–female competition for non-sexual  
340 breeding resources (Tobias et al., 2012). In the present study, similar male and female

341 repertoire sizes may be explained by bellbird social ecology. Bellbirds are socially  
342 monogamous, and both sexes are highly social and aggressive in singing interactions  
343 (Roper, 2018). It is plausible, therefore, that similar intensity of competition and social  
344 interaction drive the evolution of similar syllable diversity in the two sexes. However, our  
345 analysis is on population-level repertoires, which are a product of both individual  
346 repertoire sizes and variation between individuals. For example, equal male and female  
347 population repertoire sizes could also result if male individual repertoires are larger and  
348 more consistent between individuals (cultural conformity; Aplin et al., 2015), and females  
349 smaller and more variable (cultural non-conformity; Riebel et al., 2015). Additional  
350 focused recording of banded individuals is required to quantify these two sources of  
351 diversity.

352 It is interesting that population repertoire sizes varied greatly between sites. Adaptation  
353 to differing acoustic environments (Potvin and Clegg, 2015; Graham et al., 2017b) seems  
354 an unlikely explanation, as all sites were coastal, with similar vegetation (though  
355 soundscape was not measured). Another potential explanation is that genetic diversity  
356 has driven population repertoire size. However, sites with low genetic diversity (Baillie,  
357 2011) did not have correspondingly low syllable diversity, suggesting song culture is not  
358 tightly constrained by genetic diversity in bellbirds (see also Graham et al., 2018). We  
359 suspect that between-site differences in repertoire size are more likely driven by  
360 competition level. For example, sites with higher population density may have elevated  
361 competition for food, or sites with high population connectivity may experience increased  
362 competitive encounters with migrants—selecting for bigger individual repertoires.

363 The discovery of sexually distinct, yet partly overlapping syllable repertoires raises  
364 questions about transmission and function. Logically, all sex-specific syllable types must

365 be learnt male-to-male or female-to-female (as in rufous-and-white wrens, for example;  
366 Mennill and Vehrencamp, 2005). But what of types common to both sexes? These must  
367 reflect inter-sexual learning in some form, whether accidental or intentional (Evans and  
368 Kleindorfer, 2016). Once learnt inter-sexually, these memes could be transmitted intra-  
369 sexually and become an established part of the repertoire for that sex. Roper et al. (2018)  
370 found that juvenile male and female bellbird song is spectrally similar, then diverges prior  
371 to crystallisation. Perhaps both sexes of bellbird are physiologically capable of  
372 overlapping in acoustic space, but other factors (e.g., learning strategies, sexual/social  
373 selection) prevent it in the wild. This appears true in slate-coloured boubous *Laniarius*  
374 *funnebris*; male and female boubous share no syllable types in the wild, but birds hand-  
375 raised under experimental conditions develop syllables of both sexes (Wickler and Seibt,  
376 1988). Wild birds may choose to express sex-specific memes to help avoid being mistaken  
377 for the other sex, which risks attracting same-sex rivals or repelling potential mates  
378 (Logue et al., 2007). However, the benefit of *shared* syllables is unclear. Might sex-specific  
379 syllables function in intra-sexual communication, and shared syllables in inter-sexual  
380 communication? Sophisticated field experiments with banded individuals are needed to  
381 resolve meme functions and transmission modes in bellbirds.

382 We found that male-specific and female-specific syllables do occupy two largely distinct  
383 regions of acoustic space, with shared syllables occupying a cluster between in a 'sex-  
384 neutral' range (Figure 3). In the ordination, the separation of male-specific and female-  
385 specific memes could be due to universal morphological constraints of body size and  
386 syrinx structure, as males are 20% larger than females (Heather and Robertson, 2000)  
387 and have different syrinx morphologies (Roper, 2018). At the same time, the spread and  
388 shape of the clusters vary widely between sites, which may reflect site-specific cultures.

389 The pattern of meme sharing between sites defied our expectations. Repertoire similarity  
390 was not strongly related to geographic proximity between islands; only males showed  
391 some evidence of isolation with distance from Hauturu (Figure 5). However, for both  
392 sexes the percentage of syllable types shared between sites was small, and almost totally  
393 limited to pure-tone whistle syllables and simple stutter-like syllables (except for  
394 Hauturu–Tawharanui, which shared more types, likely due to the recent founder event  
395 described in Brunton et al., 2008). The observed pattern suggests that immigrants  
396 abandon most source memes after arrival, retaining only pure-tone and stutter-like types.  
397 Perhaps all but these simple types incur high aggression at new sites ('colony password'  
398 hypothesis; Feekes, 1977) and so are dropped in favour of the local dialect.

399 The large size and geographic centrality of the Hauturu population make it a likely source  
400 of dispersing bellbirds to other sites in the archipelago. Thus, one might expect the islands  
401 around Hauturu to form a chain of 'stepping stones' for bellbird dispersal, leading to  
402 progressively more dissimilar repertoires away from the central source population. There  
403 are many examples of such chains (Irwin et al., 2005; Parker et al., 2012; Lachlan et al.,  
404 2013). In contrast, we found that for both male and female bellbirds, sites at increasing  
405 distances from Hauturu did not share a progressively diminishing subset of syllable types  
406 with Hauturu, but different (apparently unrelated) subsets (Data S2). Therefore, our  
407 results suggest direct dispersal to each site from Hauturu, rather than serial dispersal  
408 along the island chain.

409 We predicted that female-biased dispersal in bellbirds should result in higher female  
410 meme flow and thus higher inter-site sharing for females than for males. Instead, we  
411 found no evidence for a sexual difference in amount of sharing between sites. That females  
412 do not show higher inter-site sharing suggests that other processes—such as a higher



413 turnover rate or weaker retention of source memes—counteract the greater connectivity  
414 of females between sites.

415 Large-scale studies of song culture in the wild are challenging. In contrast to a laboratory  
416 situation, it is difficult to amass data, the identity of individuals is not known, and there is  
417 little control over the social context of singing—which limits assessment of individual-  
418 level mechanisms. However, our population-level analyses reveal distinct and complex  
419 female culture with different spatial patterns to male culture. This underlines the  
420 inadequacy of the male-centric research paradigm and calls for comparisons of male and  
421 female repertoires in many more species (Riebel et al., 2019). Sophisticated field  
422 experiments are now needed to resolve the mechanisms of dispersal, selection and  
423 learning modes that give rise to the pattern we have uncovered.

424

425

## 426 **Author contributions**

427 Dianne Brunton and Wesley Webb conceived of the study. Wesley Webb, Michelle Roper,  
428 Dianne Brunton, and Aaron Harmer conducted the fieldwork with help from volunteers.  
429 Wesley Webb, Yukio Fukuzawa, and Michelle Roper created the song database. Wesley  
430 Webb, Yukio Fukuzawa and Matthew Pawley analysed the data, with guidance from  
431 Dianne Brunton and Aaron Harmer. Wesley Webb wrote the paper with guidance from  
432 the other authors.

## 433 **Data availability**

434 The interactive *Koe* database can be accessed online at [koe.io.ac.nz](http://koe.io.ac.nz) with username  
435 *korimako* and password Bellbird\_Culture. See Data S3 for a table of all acoustic units and  
436 annotations, and Data S4 for a table of all songs and their metadata. Measurements of all  
437 syllables can be accessed at [10.5281/zenodo.5072580](https://zenodo.org/record/5072580).

## 438 **Acknowledgements**

439 We thank Ngati Wai and Ngati Manuhiri iwi for their support, and Barbara Evans, Jessica  
440 Patino-Perez, and Mehrnaz Tavasoli for their help with recording song. The research was  
441 funded by a Marsden Fund grant (13-MAU-004) from the Royal Society of New Zealand  
442 Te Apārangi. The manuscript was improved by feedback from Rebecca Webb.

443

## 444 **References**

- 445 Aplin, L. M. (2019). Culture and cultural evolution in birds: a review of the evidence.  
446 *Anim. Behav.* 147, 179–187. doi:10.1016/j.anbehav.2018.05.001.
- 447 Aplin, L. M., Farine, D. R., Morand-Ferron, J., Cockburn, A., Thornton, A., and Sheldon, B. C.  
448 (2015). Experimentally induced innovations lead to persistent culture via  
449 conformity in wild birds. *Nature* 518, 538–541. doi:10.1038/nature13998.
- 450 Austin, V. I., Dalziell, A. H., Langmore, N. E., and Welbergen, J. A. (2021). Avian  
451 vocalisations: the female perspective. *Biol. Rev.* 96, 1484–1503.  
452 doi:10.1111/brv.12713.
- 453 Baillie, S. M. (2011). Population genetics, biogeography and ecological interactions of the  
454 New Zealand bellbird (*Anthornis melanura*) and their avian malaria parasites: a  
455 thesis presented in partial fulfilment of the requirements for the degree of Doctor  
456 of Philosophy (Ph. D.) in Zoology at Massey University, Albany, New Zealand.  
457 Available at: <http://muir.massey.ac.nz/handle/10179/2863> [Accessed July 18,  
458 2014].

- 459 Baillie, S. M., Ritchie, P. A., and Brunton, D. H. (2014). Population genetic connectivity of  
460 an endemic New Zealand passerine after large-scale local extirpations: a model of  
461 re-colonization potential. *Ibis* 156, 826–839. doi:10.1111/ibi.12182.
- 462 Baptista, L. F., and Schuchmann, K.-L. (1990). Song learning in the Anna hummingbird  
463 (*Calypte anna*). *Ethology* 84, 15–26.
- 464 Brown, R. N., and Lemon, R. E. (1979). Structure and evolution of song form in the wrens  
465 *Thryothorus sinaloa* and *T. felix*. *Behav. Ecol. Sociobiol.* 5, 111–131.  
466 doi:10.1007/BF00293301.
- 467 Brunton, D. H., Evans, B. A., and Ji, W. (2008). Assessing natural dispersal of New Zealand  
468 bellbirds using song type and song playbacks. *N. Z. J. Ecol.* 32, 147–154.
- 469 Catchpole, C. K. (1987). Bird song, sexual selection and female choice. *Trends Ecol. Evol.*  
470 2, 94–97. doi:10.1016/0169-5347(87)90165-0.
- 471 Catchpole, C. K., and Slater, P. J. B. (2008). *Bird song: Biological themes and variations*.  
472 2nd ed. New York, NY, US: Cambridge University Press  
473 doi:10.1017/CBO9780511754791.
- 474 Clarke, A. L., Saether, B.-E., and Røskaft, E. (1997). Sex biases in avian dispersal: a  
475 reappraisal. *Oikos*, 429–438. doi:10.2307/3546885.
- 476 Clarke, K. R., and Gorley, R. N. (2015). *PRIMER v7: User Manual/Tutorial*. PRIMER-  
477 E Plymouth.
- 478 Colwell, R. (2013). *EstimateS: Statistical estimation of species richness and shared species*  
479 *from samples*. Available at: <http://purl.oclc.org/estimates>.
- 480 Darwin, C. (1871). *The descent of man and selection in relation to sex*. London: John  
481 Murray.
- 482 Dawkins, R. (1976). *The selfish gene*. Oxford University Press.
- 483 Dixon, W. J., and Mood, A. M. (1946). The Statistical Sign Test. *J. Am. Stat. Assoc.* 41, 557–  
484 566. doi:10.1080/01621459.1946.10501898.
- 485 Dooling, R. (2004). “Audition: can birds hear everything they sing?,” in *Nature’s Music*  
486 (Elsevier), 206–225. doi:10.1016/B978-012473070-0/50010-4.
- 487 Duda, R. O., Hart, P. E., and Stork, D. G. (2012). *Pattern classification*. John Wiley & Sons.
- 488 Evans, C., and Kleindorfer, S. (2016). Superb fairy-wren (*Malurus cyaneus*) sons and  
489 daughters acquire song elements of mothers and social fathers. *Front. Ecol. Evol.*  
490 4, 9.
- 491 Feekes, F. (1977). Colony-specific song in *Cacicus cela* (Icteridae, Aves) - password  
492 hypothesis. *Ardea* 65, 197–202.
- 493 Fukuzawa, Y., Webb, W. H., Pawley, M. D. M., Roper, M. M., Marsland, S., Brunton, D. H., et  
494 al. (2020). Koe: Web-based software to classify acoustic units and analyse

- 495 sequence structure in animal vocalizations. *Methods Ecol. Evol.* 11, 431–441.  
496 doi:10.1111/2041-210X.13336.
- 497 Graham, B. A., Heath, D. D., and Mennill, D. J. (2017a). Dispersal influences genetic and  
498 acoustic spatial structure for both males and females in a tropical songbird. *Ecol.*  
499 *Evol.* 7, 10089–10102. doi:10.1002/ece3.3456.
- 500 Graham, B. A., Heath, D. D., and Mennill, D. J. (2021). Female and male song exhibit both  
501 parallel and divergent patterns of cultural evolution: A long-term study of song  
502 structure and diversity in tropical wrens. *Ornithology* 138.  
503 doi:10.1093/ornithology/ukaa067.
- 504 Graham, B. A., Heath, D. D., Walter, R. P., Mark, M. M., and Mennill, D. J. (2018a). Parallel  
505 evolutionary forces influence the evolution of male and female songs in a tropical  
506 songbird. *J. Evol. Biol.* 31, 979–994. doi:10.1111/jeb.13279.
- 507 Graham, B. A., Heath, D. D., Walter, R. P., and Mennill, D. J. (2018b). Immigrant song:  
508 males and females learn songs after dispersal in a tropical bird. *Behav. Ecol.* 29,  
509 711–723. doi:10.1093/beheco/ary029.
- 510 Graham, B. A., Sandoval, L., Dabelsteen, T., and Mennill, D. J. (2017b). A test of the  
511 Acoustic Adaptation Hypothesis in three types of tropical forest: degradation of  
512 male and female Rufous-and-white Wren songs. *Bioacoustics* 26, 37–61.  
513 doi:10.1080/09524622.2016.1181574.
- 514 Greenwood, P. J. (1980). Mating systems, philopatry and dispersal in birds and  
515 mammals. *Anim. Behav.* 28, 1140–1162. doi:10.1016/S0003-3472(80)80103-5.
- 516 Hall, M. L. (2000). The function of duetting in magpie-larks: conflict, cooperation, or  
517 commitment? *Anim. Behav.* 60, 667–677. doi:10.1006/anbe.2000.1517.
- 518 Hall, M. L., Rittenbach, M. R. D., and Vehrencamp, S. L. (2015). Female song and vocal  
519 interactions with males in a neotropical wren. *Behav. Evol. Ecol.* 3, 12.  
520 doi:10.3389/fevo.2015.00012.
- 521 Hamers, L., Hemeryck, Y., Herweyers, G., Janssen, M., Keters, H., Rousseau, R., et al.  
522 (1989). Similarity measures in scientometric research: The Jaccard index versus  
523 Salton's cosine formula. *Inf. Process. Manag.* 25, 315–318. doi:10.1016/0306-  
524 4573(89)90048-4.
- 525 Heather, B. D., and Robertson, H. A. (2000). *The field guide to the birds of New Zealand*.  
526 Viking\Penguin Books.
- 527 Hill, S. D., Brunton, D. H., Anderson, M. G., and Ji, W. (2018). Fighting talk: complex song  
528 elicits more aggressive responses in a vocally complex songbird. *Ibis* 160, 257–  
529 268.
- 530 Illes, A. E. (2014). Context of female bias in song repertoire size, singing effort, and  
531 singing independence in a cooperatively breeding songbird. *Behav. Ecol.*  
532 *Sociobiol.*, 1–12. doi:10.1007/s00265-014-1827-3.

- 533 Irwin, D. E., Bensch, S., Irwin, J. H., and Price, T. D. (2005). Speciation by distance in a ring  
534 species. *Science* 307, 414–416. doi:10.1126/science.1105201.
- 535 Janik, V. M., and Slater, P. J. (1997). Vocal learning in mammals. *Adv. Study Behav.* 26, 59–  
536 100.
- 537 Jenkins, P. F. (1978). Cultural transmission of song patterns and dialect development in a  
538 free-living bird population. *Anim. Behav.* 26, 50–78. doi:10.1016/0003-  
539 3472(78)90007-6.
- 540 Kroodsma, D., Hamilton, D., Sánchez, J. E., Byers, B. E., Fandiño-Mariño, H., Stemple, D. W.,  
541 et al. (2013). Behavioral Evidence for Song Learning in the Suboscine Bellbirds  
542 (*Procnias* spp.; Cotingidae). *Wilson J. Ornithol.* 125, 1–14. doi:10.1676/12-033.1.
- 543 Lachlan, R. F., Verzijden, M. N., Bernard, C. S., Jonker, P.-P., Koese, B., Jaarsma, S., et al.  
544 (2013). The progressive loss of syntactical structure in bird song along an island  
545 colonization chain. *Curr. Biol.* 23, 1896–1901. doi:10.1016/j.cub.2013.07.057.
- 546 Lande, R. (1980). Sexual dimorphism, sexual selection, and adaptation in polygenic  
547 characters. *Evolution* 34, 292–305. doi:10.2307/2407393.
- 548 Levin, R. N. (1996). Song behaviour and reproductive strategies in a duetting wren,  
549 *Thryothorus nigricapillus*: I. Removal experiments. *Anim. Behav.* 52, 1093–1106.  
550 doi:10.1006/anbe.1996.0257.
- 551 Logue, D. M., Droessler, E. E., Roscoe, D. W., Vokey, J. R., Rendall, D., and Kunimoto, R. M.  
552 (2007). Sexually antithetical song structure in a duet singing wren. *Behaviour*  
553 144, 331–350. doi:10.1163/156853907780425749.
- 554 Mann, N. I., Dingess, K. A., Barker, F. K., Graves, J. A., and Slater, P. J. B. (2009). A  
555 comparative study of song form and duetting in neotropical *Thryothorus* wrens.  
556 *Behaviour* 146, 1–43.
- 557 Mennill, D. J., and Rogers, A. C. (2006). Whip it good! Geographic consistency in male  
558 songs and variability in female songs of the duetting eastern whipbird *Psophodes*  
559 *olivaceus*. *J. Avian Biol.* 37, 93–100. doi:10.1111/j.0908-8857.2006.03548.x.
- 560 Mennill, D. J., and Vehrencamp, S. L. (2005). Sex differences in singing and duetting  
561 behavior of neotropical rufous-and-white wrens (*Thryothorus rufalbus*). *The Auk*  
562 122, 175–186. doi:10.1642/0004-8038(2005)122[0175:SDISAD]2.0.CO;2.
- 563 Odom, K. J., Hall, M. L., Riebel, K., Omland, K. E., and Langmore, N. E. (2014). Female song  
564 is widespread and ancestral in songbirds. *Nat. Commun.* 5.  
565 doi:10.1038/ncomms4379.
- 566 Paris, D., Nicholls, A. O., Hall, A., Harvey, A., and Massaro, M. (2016). Female-biased  
567 dispersal in a spatially restricted endemic island bird. *Behav. Ecol. Sociobiol.* 70,  
568 2061–2069. doi:10.1007/s00265-016-2210-3.

- 569 Parker, K. A., Anderson, M. J., Jenkins, P. F., and Brunton, D. H. (2012). The effects of  
570 translocation-induced isolation and fragmentation on the cultural evolution of  
571 bird song. *Ecol. Lett.* 15, 778–785. doi:10.1111/j.1461-0248.2012.01797.x.
- 572 Paton, J. A., Manogue, K. R., and Nottebohm, F. (1981). Bilateral organization of the vocal  
573 control pathway in the budgerigar, *Melopsittacus undulatus*. *J. Neurosci.* 1, 1279–  
574 1288.
- 575 Podos, J., and Warren, P. S. (2007). “The evolution of geographic variation in birdsong,”  
576 in *Advances in the Study of Behavior*, eds. H. J. Brockmann, T. J. Roper, M. Naguib,  
577 K. E. Wynne-Edwards, C. Barnard, and J. Mitani (Academic Press), 403–458.  
578 Available at:  
579 <http://www.sciencedirect.com/science/article/pii/S0065345407370095>.
- 580 Poole, J. H., Tyack, P. L., Stoeger-Horwath, A. S., and Watwood, S. (2005). Animal  
581 behaviour: elephants are capable of vocal learning. *Nature* 434, 455.
- 582 Potvin, D. A., and Clegg, S. M. (2015). The relative roles of cultural drift and acoustic  
583 adaptation in shaping syllable repertoires of island bird populations change with  
584 time since colonization. *Evolution* 69, 368–380. doi:10.1111/evo.12573.
- 585 Price, J. J. (2015). Rethinking our assumptions about the evolution of bird song and other  
586 sexually dimorphic signals. *Behav. Evol. Ecol.* 3, 40. doi:10.3389/fevo.2015.00040.
- 587 Riebel, K., Lachlan, R. F., and Slater, P. J. B. (2015). “Chapter Six - Learning and Cultural  
588 Transmission in Chaffinch Song,” in *Advances in the Study of Behavior*, eds. M.  
589 Naguib, H. J. Brockmann, J. C. Mitani, L. W. Simmons, L. Barrett, S. Healy, et al.  
590 (Academic Press), 181–227. doi:10.1016/bs.asb.2015.01.001.
- 591 Riebel, K., Odom, K. J., Langmore, N. E., and Hall, M. L. (2019). New insights from female  
592 bird song: towards an integrated approach to studying male and female  
593 communication roles. *Biol. Lett.* 15, 20190059.
- 594 Roper, M. M. (2018). Sexual dimorphism of song and life history trade-offs in the New  
595 Zealand bellbird: a thesis presented in partial fulfilment of the requirements for  
596 the degree of Doctor of Philosophy (Ph. D.) in Ecology at Massey University,  
597 Albany, New Zealand.
- 598 Roper, M. M., Harmer, A. M. T., and Brunton, D. H. (2018). Developmental changes in  
599 song production in free-living male and female New Zealand bellbirds. *Anim.*  
600 *Behav.* 140, 57–71. doi:10.1016/j.anbehav.2018.04.003.
- 601 Sanvito, S., Galimberti, F., and Miller, E. H. (2007). Observational evidences of vocal  
602 learning in southern elephant seals: a longitudinal study. *Ethology* 113, 137–146.  
603 doi:10.1111/j.1439-0310.2006.01306.x.
- 604 Sayigh, L. S., Esch, H. C., Wells, R. S., and Janik, V. M. (2007). Facts about signature  
605 whistles of bottlenose dolphins, *Tursiops truncatus*. *Anim. Behav.* 74, 1631–1642.  
606 doi:10.1016/j.anbehav.2007.02.018.

- 607 Sokal, R. R. (1958). A statistical method for evaluating systematic relationship. *Univ.*  
608 *Kans. Sci. Bull.* 28, 1409–1438.
- 609 Tobias, J. A., Montgomerie, R., and Lyon, B. E. (2012). The evolution of female ornaments  
610 and weaponry: social selection, sexual selection and ecological competition.  
611 *Philos. Trans. R. Soc. Lond. B Biol. Sci.* 367, 2274–2293.  
612 doi:10.1098/rstb.2011.0280.
- 613 Webb, W. H., Brunton, D. H., Aguirre, J. D., Thomas, D. B., Valcu, M., and Dale, J. (2016).  
614 Female song occurs in songbirds with more elaborate female coloration and  
615 reduced sexual dichromatism. *Front. Ecol. Evol.* 4, 22.
- 616 Whitehead, H., and Rendell, L. (2014). *The cultural lives of whales and dolphins.*  
617 University of Chicago Press.
- 618 Wickler, W., and Seibt, U. (1980). Vocal duetting and the pair bond. *Z. Für Tierpsychol.* 52,  
619 217–226. doi:10.1111/j.1439-0310.1980.tb00713.x.
- 620 Wickler, W., and Seibt, U. (1988). “Gender dialects” — a new phenomenon from birdsong  
621 epigenesis. *Naturwissenschaften* 75, 51–52. doi:10.1007/BF00367445.
- 622
